# Supplementary material
Source: publisher site journal article supplement (https://www.spandidos-publications.com/673/downloadSupplementary)
Supplement: Supplementary file 1 [file downloadSupplementary]

## Sheet: Sheet1
Table SI. The association of LINC01420 expression levels with clinicopathological data.
LINC01420	Hybridizatio	Patient Identifier	Person Gender	Race Category	AGE	Tumor Disease Anatomic Site	tumor type	GENDER	TUMOR_STATUS	VITAL_STATUS	AGE	LYMPH_NODE_EXAMINED_COUNT	LYMPH_NODES_EXAMINED_HE_COUNT	EXTRATHYROIDAL_EXTENSION	RESIDUAL_TUMOR	AJCC_TUMOR_PATHOLOGIC_PT	AJCC_NODES_PATHOLOGIC_PN	AJCC_METASTASIS_PATHOLOGIC_PM	AJCC_PATHOLOGIC_TUMOR_STAGE	OS_STATUS	OS_MONTHS	DFS_STATUS	DFS_MONTHS
805.081	TCGA-BJ-A0YZ	TCGA-BJ-A0YZ	MALE	WHITE	65	Thyroid	THCA	MALE	TUMOR FREE	Alive	65	[Not Available]	[Not Available]	None	R0	T2	N0	M0	Stage II	LIVING	24.77	DiseaseFree	24.77
621.064	TCGA-BJ-A0Z0	TCGA-BJ-A0Z0	MALE	[Not Available]	55	Thyroid	THCA	MALE	TUMOR FREE	Alive	55	5	0	None	R0	T2	N0	MX	Stage II	LIVING	13.76	DiseaseFree	13.76
646.633	TCGA-BJ-A0Z2	TCGA-BJ-A0Z2	MALE	BLACK OR AFRICAN AMERICAN	57	Thyroid	THCA	MALE	WITH TUMOR	Alive	57	[Not Available]	[Not Available]	None	RX	T2	N0	M1	Stage IVC	LIVING	49.74	Recurred/Progressed	5.19
603.857	TCGA-BJ-A0Z3	TCGA-BJ-A0Z3	FEMALE	WHITE	33	Thyroid	THCA	FEMALE	TUMOR FREE	Alive	33	3	0	None	RX	T1	N0	M0	Stage I	LIVING	16.33	DiseaseFree	16.33
545.163	TCGA-BJ-A0Z5	TCGA-BJ-A0Z5	MALE	WHITE	58	Thyroid	THCA	MALE	TUMOR FREE	Alive	58	5	4	[Not Available]	[Not Available]	T3	N1a	M0	Stage III	LIVING	14.72	DiseaseFree	14.72
513.217	TCGA-BJ-A0Z9	TCGA-BJ-A0Z9	FEMALE	WHITE	57	Thyroid	THCA	FEMALE	TUMOR FREE	Alive	57	6	0	Minimal (T3)	R1	T3	N0	MX	Stage III	LIVING	41.29	DiseaseFree	41.29
456.885	TCGA-BJ-A0ZA	TCGA-BJ-A0ZA	FEMALE	WHITE	67	Thyroid	THCA	FEMALE	TUMOR FREE	Alive	67	2	0	None	R0	T2	N0	M0	Stage II	LIVING	18.86	DiseaseFree	18.86
422.721	TCGA-BJ-A0ZB	TCGA-BJ-A0ZB	MALE	WHITE	66	Thyroid	THCA	MALE	TUMOR FREE	Alive	66	6	5	Moderate/Advanced (T4a)	R1	T3	N1b	M0	Stage IVA	LIVING	4.01	DiseaseFree	4.01
639.387	TCGA-BJ-A0ZC	TCGA-BJ-A0ZC	MALE	WHITE	55	Thyroid	THCA	MALE	TUMOR FREE	Alive	55	[Not Available]	[Not Available]	None	R0	T1	N0	M0	Stage I	LIVING	11.56	DiseaseFree	11.56
932.416	TCGA-BJ-A0ZE	TCGA-BJ-A0ZE	FEMALE	WHITE	63	Thyroid	THCA	FEMALE	TUMOR FREE	Alive	63	[Not Available]	[Not Available]	Minimal (T3)	R1	T3	N0	M0	Stage III	LIVING	16.72	DiseaseFree	16.72
643.697	TCGA-BJ-A0ZG	TCGA-BJ-A0ZG	MALE	WHITE	80	Thyroid	THCA	MALE	TUMOR FREE	Alive	80	[Not Available]	[Not Available]	None	RX	T1	N0	M0	Stage I	LIVING	25.46	DiseaseFree	25.46
598.442	TCGA-BJ-A0ZH	TCGA-BJ-A0ZH	FEMALE	WHITE	52	Thyroid	THCA	FEMALE	[Not Available]	Alive	52	4	1	None	RX	T2	N1b	MX	Stage IVA	LIVING	15.11	DiseaseFree	15.11
637.792	TCGA-BJ-A0ZJ	TCGA-BJ-A0ZJ	MALE	WHITE	36	Thyroid	THCA	MALE	TUMOR FREE	Alive	36	8	1	None	R0	T2	N1a	M0	Stage I	LIVING	42.05	DiseaseFree	42.05
625.521	TCGA-BJ-A18Y	TCGA-BJ-A18Y	MALE	WHITE	29	Thyroid	THCA	MALE	[Not Available]	Alive	29	5	0	None	R0	T1b	N0	MX	Stage I	LIVING	51.35	DiseaseFree	51.35
556.838	TCGA-BJ-A18Z	TCGA-BJ-A18Z	MALE	WHITE	58	Thyroid	THCA	MALE	[Not Available]	Alive	58	37	3	Minimal (T3)	R1	T3	N1b	MX	Stage IVA	LIVING	41.49	DiseaseFree	41.49
670.91	TCGA-BJ-A190	TCGA-BJ-A190	MALE	WHITE	55	Thyroid	THCA	MALE	TUMOR FREE	Alive	55	1	0	None	R0	T2	N0	MX	Stage II	LIVING	20.57	DiseaseFree	20.57
557.154	TCGA-BJ-A191	TCGA-BJ-A191	FEMALE	WHITE	49	Thyroid	THCA	FEMALE	TUMOR FREE	Alive	49	3	0	None	R0	T1b	N0	M0	Stage I	LIVING	4.83	DiseaseFree	4.83
634.658	TCGA-BJ-A192	TCGA-BJ-A192	FEMALE	WHITE	54	Thyroid	THCA	FEMALE	[Not Available]	Alive	54	0	[Not Available]	Minimal (T3)	RX	T3	NX	M0	Stage III	LIVING	44.32	DiseaseFree	44.32
542.618	TCGA-BJ-A28R	TCGA-BJ-A28R	FEMALE	WHITE	38	Thyroid	THCA	FEMALE	TUMOR FREE	Alive	38	17	0	[Not Available]	[Not Available]	T1	N0	M0	Stage I	LIVING	42.12	DiseaseFree	42.12
535.652	TCGA-BJ-A28S	TCGA-BJ-A28S	MALE	WHITE	79	Thyroid	THCA	MALE	TUMOR FREE	Alive	79	[Not Available]	[Not Available]	[Not Available]	[Not Available]	T2	N0	M0	Stage II	LIVING	21.02	DiseaseFree	21.02
445.813	TCGA-BJ-A28T	TCGA-BJ-A28T	FEMALE	WHITE	34	Thyroid	THCA	FEMALE	TUMOR FREE	Alive	34	9	3	[Not Available]	[Not Available]	T1	N1a	M0	Stage I	LIVING	35.51	DiseaseFree	35.51
759.786	TCGA-BJ-A28V	TCGA-BJ-A28V	FEMALE	WHITE	80	Thyroid	THCA	FEMALE	[Not Available]	Alive	80	[Not Available]	[Not Available]	[Not Available]	[Not Available]	T3	N0	MX	Stage III	LIVING	32.42	DiseaseFree	32.42
851.876	TCGA-BJ-A28W	TCGA-BJ-A28W	FEMALE	WHITE	32	Thyroid	THCA	FEMALE	[Not Available]	Alive	32	4	0	[Not Available]	[Not Available]	T2	N0	M0	Stage I	LIVING	11.3	DiseaseFree	11.3
401.002	TCGA-BJ-A28X	TCGA-BJ-A28X	FEMALE	WHITE	32	Thyroid	THCA	FEMALE	TUMOR FREE	Alive	32	8	2	Minimal (T3)	R0	T3	N1a	M0	Stage I	LIVING	30.95	Recurred/Progressed	16.23
464.829	TCGA-BJ-A28Z	TCGA-BJ-A28Z	FEMALE	WHITE	46	Thyroid	THCA	FEMALE	[Not Available]	Alive	46	16	1	Minimal (T3)	[Not Available]	T3	N1a	M0	Stage III	LIVING	11.07	DiseaseFree	11.07
676.918	TCGA-BJ-A290	TCGA-BJ-A290	MALE	WHITE	70	Thyroid	THCA	MALE	WITH TUMOR	Alive	70	3	3	Minimal (T3)	[Not Available]	T3	N1a	M0	Stage III	LIVING	30.19	Recurred/Progressed	10.81
792.614	TCGA-BJ-A291	TCGA-BJ-A291	FEMALE	WHITE	56	Thyroid	THCA	FEMALE	TUMOR FREE	Alive	56	9	0	[Not Available]	[Not Available]	T1	N0	M0	Stage I	LIVING	22.86	DiseaseFree	22.86
584.001	TCGA-BJ-A2N7	TCGA-BJ-A2N7	FEMALE	WHITE	30	Thyroid	THCA	FEMALE	WITH TUMOR	Alive	30	[Not Available]	[Not Available]	Minimal (T3)	R0	T3	N0	M0	Stage I	LIVING	18.36	DiseaseFree	18.36
939.708	TCGA-BJ-A2N8	TCGA-BJ-A2N8	FEMALE	WHITE	30	Thyroid	THCA	FEMALE	TUMOR FREE	Alive	30	2	0	[Not Available]	[Not Available]	T1b	N0	M0	Stage I	LIVING	16.56	DiseaseFree	16.56
676.062	TCGA-BJ-A2N9	TCGA-BJ-A2N9	FEMALE	WHITE	42	Thyroid	THCA	FEMALE	TUMOR FREE	Alive	42	3	0	None	R1	T2	N0	M0	Stage I	LIVING	20.47	Recurred/Progressed	7.39
602.821	TCGA-BJ-A2NA	TCGA-BJ-A2NA	MALE	WHITE	77	Thyroid	THCA	MALE	WITH TUMOR	Alive	77	1	0	Minimal (T3)	R1	T3	N0	M0	Stage III	LIVING	18.96	Recurred/Progressed	4.17
942.982	TCGA-BJ-A2P4	TCGA-BJ-A2P4	FEMALE	WHITE	29	Thyroid	THCA	FEMALE	TUMOR FREE	Alive	29	[Not Available]	[Not Available]	[Not Available]	R0	T2	N0	M0	Stage I	LIVING	12.81	DiseaseFree	12.81
557.638	TCGA-BJ-A3EZ	TCGA-BJ-A3EZ	MALE	WHITE	51	Thyroid	THCA	MALE	WITH TUMOR	Alive	51	42	6	Minimal (T3)	R1	T3	N1b	M0	Stage IVA	LIVING	16	DiseaseFree	16
565.825	TCGA-BJ-A3F0	TCGA-BJ-A3F0	FEMALE	WHITE	64	Thyroid	THCA	FEMALE	TUMOR FREE	Alive	64	[Not Available]	[Not Available]	None	R0	T1b	N0	M0	Stage I	LIVING	13.93	DiseaseFree	13.93
551.013	TCGA-BJ-A3PR	TCGA-BJ-A3PR	FEMALE	WHITE	69	Thyroid	THCA	FEMALE	TUMOR FREE	Alive	69	6	0	None	R0	T1a	N0	M0	Stage I	LIVING	36.37	DiseaseFree	36.37
775.769	TCGA-BJ-A3PT	TCGA-BJ-A3PT	FEMALE	WHITE	51	Thyroid	THCA	FEMALE	TUMOR FREE	Alive	51	[Not Available]	[Not Available]	[Not Available]	[Not Available]	T3	N0	M0	Stage III	LIVING	23.29	DiseaseFree	23.29
777.595	TCGA-BJ-A3PU	TCGA-BJ-A3PU	MALE	WHITE	52	Thyroid	THCA	MALE	WITH TUMOR	Alive	52	7	7	Minimal (T3)	R0	T3	N1a	M0	Stage III	LIVING	18.63	Recurred/Progressed	7.26
642.567	TCGA-BJ-A45C	TCGA-BJ-A45C	MALE	BLACK OR AFRICAN AMERICAN	78	Thyroid	THCA	MALE	WITH TUMOR	Dead	78	2	0	Minimal (T3)	[Not Available]	T3	N0	M0	Stage III	DECEASED	7.98	[Not Available]
1171.53	TCGA-BJ-A45D	TCGA-BJ-A45D	MALE	WHITE	36	Thyroid	THCA	MALE	TUMOR FREE	Alive	36	1	0	None	[Not Available]	T2	N0	M0	Stage I	LIVING	10.87	DiseaseFree	10.87
491.744	TCGA-BJ-A45E	TCGA-BJ-A45E	FEMALE	WHITE	46	Thyroid	THCA	FEMALE	TUMOR FREE	Alive	46	4	0	[Not Available]	[Not Available]	T1a	N0	M0	Stage I	LIVING	20.99	DiseaseFree	20.99
657.998	TCGA-BJ-A45F	TCGA-BJ-A45F	FEMALE	WHITE	59	Thyroid	THCA	FEMALE	TUMOR FREE	Alive	59	[Not Available]	[Not Available]	[Not Available]	[Not Available]	T1b	N0	M0	Stage I	LIVING	3.45	DiseaseFree	3.45
673.253	TCGA-BJ-A45G	TCGA-BJ-A45G	FEMALE	WHITE	48	Thyroid	THCA	FEMALE	TUMOR FREE	Alive	48	7	4	None	[Not Available]	T2	N1	M0	Stage III	LIVING	23.82	DiseaseFree	23.82
743.829	TCGA-BJ-A45H	TCGA-BJ-A45H	MALE	WHITE	45	Thyroid	THCA	MALE	WITH TUMOR	Alive	45	[Not Available]	[Not Available]	Minimal (T3)	[Not Available]	T3	N0	M0	Stage III	LIVING	28.42	DiseaseFree	28.42
577.551	TCGA-BJ-A45I	TCGA-BJ-A45I	FEMALE	WHITE	51	Thyroid	THCA	FEMALE	WITH TUMOR	Alive	51	6	0	Minimal (T3)	R2	T3	N0	M0	Stage III	LIVING	15.44	Recurred/Progressed	3.61
753.758	TCGA-BJ-A45J	TCGA-BJ-A45J	FEMALE	WHITE	39	Thyroid	THCA	FEMALE	TUMOR FREE	Alive	39	1	1	[Not Available]	[Not Available]	T1a	N1a	M0	Stage I	LIVING	21.62	DiseaseFree	21.62
773.735	TCGA-BJ-A45K	TCGA-BJ-A45K	MALE	WHITE	33	Thyroid	THCA	MALE	[Not Available]	Alive	33	8	0	None	[Not Available]	T2	N0	M0	Stage I	LIVING	23.16	DiseaseFree	23.16
479.53	TCGA-BJ-A4O8	TCGA-BJ-A4O8	MALE	WHITE	47	Thyroid	THCA	MALE	TUMOR FREE	Alive	47	14	6	None	R0	T3	N1a	M0	Stage III	LIVING	19.42	DiseaseFree	19.42
497.997	TCGA-BJ-A4O9	TCGA-BJ-A4O9	FEMALE	WHITE	51	Thyroid	THCA	FEMALE	TUMOR FREE	Alive	51	8	0	None	[Not Available]	T2	N0	M0	Stage II	LIVING	23.46	DiseaseFree	23.46
676.953	TCGA-CE-A13K	TCGA-CE-A13K	FEMALE	ASIAN	30	Thyroid	THCA	FEMALE	TUMOR FREE	Alive	30	2	2	Minimal (T3)	R0	T3	N1	M0	Stage I	LIVING	12.65	DiseaseFree	12.65
634.324	TCGA-CE-A27D	TCGA-CE-A27D	FEMALE	ASIAN	28	Thyroid	THCA	FEMALE	TUMOR FREE	Alive	28	[Not Available]	[Not Available]	None	R0	T2	N1	M0	Stage I	LIVING	12.29	DiseaseFree	12.29
582.064	TCGA-CE-A3MD	TCGA-CE-A3MD	MALE	ASIAN	31	Thyroid	THCA	MALE	TUMOR FREE	Alive	31	3	3	None	R0	T2	N1	M0	Stage I	LIVING	12.78	DiseaseFree	12.78
453.763	TCGA-CE-A3ME	TCGA-CE-A3ME	FEMALE	ASIAN	51	Thyroid	THCA	FEMALE	TUMOR FREE	Alive	51	[Not Available]	[Not Available]	None	R0	T2	N0	M0	Stage II	LIVING	12.45	DiseaseFree	12.45
582.782	TCGA-CE-A481	TCGA-CE-A481	FEMALE	ASIAN	41	Thyroid	THCA	FEMALE	TUMOR FREE	Alive	41	[Not Available]	[Not Available]	None	R0	T1	N0	M0	Stage I	LIVING	11.37	DiseaseFree	11.37
601.356	TCGA-CE-A482	TCGA-CE-A482	FEMALE	ASIAN	27	Thyroid	THCA	FEMALE	TUMOR FREE	Alive	27	[Not Available]	[Not Available]	None	R0	T1	N1	M0	Stage I	LIVING	10.68	DiseaseFree	10.68
444.963	TCGA-CE-A483	TCGA-CE-A483	FEMALE	ASIAN	34	Thyroid	THCA	FEMALE	TUMOR FREE	Alive	34	7	4	None	R0	T2	N1	M0	Stage I	LIVING	15.01	DiseaseFree	15.01
758.908	TCGA-CE-A484	TCGA-CE-A484	FEMALE	ASIAN	37	Thyroid	THCA	FEMALE	TUMOR FREE	Alive	37	4	2	None	R0	T2	N1	M0	Stage I	LIVING	12.42	DiseaseFree	12.42
488.039	TCGA-CE-A485	TCGA-CE-A485	MALE	ASIAN	32	Thyroid	THCA	MALE	TUMOR FREE	Alive	32	2	1	None	R0	T2	N1	M0	Stage I	LIVING	12.65	DiseaseFree	12.65
498.832	TCGA-DE-A0XZ	TCGA-DE-A0XZ	FEMALE	WHITE	65	Thyroid	THCA	FEMALE	TUMOR FREE	Alive	65	7	5	None	R0	T1	N1a	M0	Stage III	LIVING	35.81	Recurred/Progressed	6.7
455.009	TCGA-DE-A0Y2	TCGA-DE-A0Y2	FEMALE	WHITE	30	Thyroid	THCA	FEMALE	TUMOR FREE	Alive	30	11	6	None	R0	T2	N1a	M0	Stage I	LIVING	21.62	DiseaseFree	21.62
387.269	TCGA-DE-A0Y3	TCGA-DE-A0Y3	FEMALE	ASIAN	60	Thyroid	THCA	FEMALE	TUMOR FREE	Alive	60	22	4	[Not Available]	R1	T4a	N1b	M1	Stage IVC	LIVING	50.13	Recurred/Progressed	0.99
791.073	TCGA-DE-A2OL	TCGA-DE-A2OL	FEMALE	WHITE	44	Thyroid	THCA	FEMALE	TUMOR FREE	Alive	44	[Not Available]	[Not Available]	None	R0	T2	NX	MX	Stage I	LIVING	37.61	DiseaseFree	37.61
523.701	TCGA-DE-A3KN	TCGA-DE-A3KN	FEMALE	WHITE	49	Thyroid	THCA	FEMALE	TUMOR FREE	Alive	49	9	5	Minimal (T3)	R0	T3	N1b	M0	Stage IVA	LIVING	27.3	DiseaseFree	27.3
529.237	TCGA-DE-A4M8	TCGA-DE-A4M8	FEMALE	WHITE	61	Thyroid	THCA	FEMALE	TUMOR FREE	Alive	61	4	1	None	R0	T2	N1	M0	Stage III	LIVING	18.53	DiseaseFree	18.53
473.421	TCGA-DE-A4M9	TCGA-DE-A4M9	MALE	WHITE	28	Thyroid	THCA	MALE	TUMOR FREE	Alive	28	[Not Available]	[Not Available]	None	R1	T2	NX	M0	Stage I	LIVING	18.82	DiseaseFree	18.82
901.575	TCGA-DE-A4MA	TCGA-DE-A4MA	FEMALE	BLACK OR AFRICAN AMERICAN	52	Thyroid	THCA	FEMALE	[Not Available]	Alive	52	11	7	Minimal (T3)	R0	T3	N1a	M0	Stage III	LIVING	30.09	DiseaseFree	30.09
544.275	TCGA-DE-A4MB	TCGA-DE-A4MB	FEMALE	WHITE	79	Thyroid	THCA	FEMALE	WITH TUMOR	Alive	79	36	3	Minimal (T3)	R1	T3	N1b	M0	Stage IVA	LIVING	11.56	DiseaseFree	11.56
547.24	TCGA-DE-A4MC	TCGA-DE-A4MC	FEMALE	AMERICAN INDIAN OR ALASKA NATIVE	43	Thyroid	THCA	FEMALE	WITH TUMOR	Alive	43	1	1	Minimal (T3)	R0	T3	N1b	M0	Stage I	LIVING	29.99	Recurred/Progressed	10.91
696.338	TCGA-DE-A4MD	TCGA-DE-A4MD	MALE	WHITE	71	Thyroid	THCA	MALE	WITH TUMOR	Alive	71	41	9	None	R0	T3	N1b	M0	Stage IVA	LIVING	25.1	Recurred/Progressed	10.84
506.989	TCGA-DE-A4MD	TCGA-DE-A4MD	MALE	WHITE	71	Thyroid	THCA	MALE	WITH TUMOR	Alive	71	41	9	None	R0	T3	N1b	M0	Stage IVA	LIVING	25.1	Recurred/Progressed	10.84
594.222	TCGA-DE-A69J	TCGA-DE-A69J	FEMALE	BLACK OR AFRICAN AMERICAN	34	Thyroid	THCA	FEMALE	WITH TUMOR	Alive	34	[Not Available]	[Not Available]	None	R0	T2	NX	M0	Stage I	LIVING	14.68	DiseaseFree	14.68
646.089	TCGA-DE-A69K	TCGA-DE-A69K	FEMALE	BLACK OR AFRICAN AMERICAN	58	Thyroid	THCA	FEMALE	WITH TUMOR	Alive	58	4	0	Minimal (T3)	R1	T3	N0	M0	Stage III	LIVING	14.26	Recurred/Progressed	14.26
535.751	TCGA-DE-A7U5	TCGA-DE-A7U5	FEMALE	BLACK OR AFRICAN AMERICAN	36	Thyroid	THCA	FEMALE	[Not Available]	Alive	36	8	0	[Not Available]	R1	T2	N0	M0	Stage I	LIVING	2.76	DiseaseFree	2.76
710.357	TCGA-DJ-A13L	TCGA-DJ-A13L	MALE	WHITE	85	Thyroid	THCA	MALE	TUMOR FREE	Alive	85	[Not Available]	[Not Available]	None	R0	T1b	N0	M0	Stage I	LIVING	9.95	DiseaseFree	9.95
1246.83	TCGA-DJ-A13M	TCGA-DJ-A13M	FEMALE	WHITE	28	Thyroid	THCA	FEMALE	TUMOR FREE	Alive	28	5	0	None	R0	T1b	N0	M0	Stage I	LIVING	48.75	DiseaseFree	48.75
789.942	TCGA-DJ-A13O	TCGA-DJ-A13O	MALE	WHITE	56	Thyroid	THCA	MALE	TUMOR FREE	Alive	56	6	0	None	R0	T1b	N0	M0	Stage I	LIVING	38.14	DiseaseFree	38.14
596.694	TCGA-DJ-A13P	TCGA-DJ-A13P	FEMALE	WHITE	52	Thyroid	THCA	FEMALE	TUMOR FREE	Alive	52	[Not Available]	[Not Available]	Minimal (T3)	R0	T2	N0	M0	Stage II	LIVING	169.19	DiseaseFree	169.19
530.555	TCGA-DJ-A13R	TCGA-DJ-A13R	MALE	WHITE	50	Thyroid	THCA	MALE	TUMOR FREE	Alive	50	2	0	None	R0	T3	N0	M0	Stage III	LIVING	18.56	DiseaseFree	18.56
462.034	TCGA-DJ-A13S	TCGA-DJ-A13S	FEMALE	WHITE	19	Thyroid	THCA	FEMALE	TUMOR FREE	Alive	19	[Not Available]	[Not Available]	None	R0	T1b	N0	M0	Stage I	LIVING	8.71	DiseaseFree	8.71
607.227	TCGA-DJ-A13T	TCGA-DJ-A13T	FEMALE	WHITE	37	Thyroid	THCA	FEMALE	TUMOR FREE	Alive	37	7	0	None	R0	T2	N0	M0	Stage I	LIVING	56.14	DiseaseFree	56.14
437.179	TCGA-DJ-A13U	TCGA-DJ-A13U	MALE	WHITE	60	Thyroid	THCA	MALE	TUMOR FREE	Alive	60	[Not Available]	[Not Available]	Minimal (T3)	R0	T3	N0	M0	Stage III	LIVING	52.23	DiseaseFree	52.23
584.001	TCGA-DJ-A13V	TCGA-DJ-A13V	FEMALE	[Not Available]	21	Thyroid	THCA	FEMALE	WITH TUMOR	Alive	21	20	8	Minimal (T3)	R0	T3	N1a	M0	Stage I	LIVING	43.13	DiseaseFree	43.13
581.231	TCGA-DJ-A13W	TCGA-DJ-A13W	FEMALE	WHITE	45	Thyroid	THCA	FEMALE	TUMOR FREE	Alive	45	3	0	None	R0	T1b	N0	M0	Stage I	LIVING	52.33	DiseaseFree	52.33
562.692	TCGA-DJ-A13X	TCGA-DJ-A13X	FEMALE	[Not Available]	51	Thyroid	THCA	FEMALE	TUMOR FREE	Alive	51	1	0	None	R0	T3	N0	M0	Stage III	LIVING	8.31	DiseaseFree	8.31
474.798	TCGA-DJ-A1QD	TCGA-DJ-A1QD	FEMALE	WHITE	20	Thyroid	THCA	FEMALE	TUMOR FREE	Alive	20	[Not Available]	[Not Available]	None	R0	T2	N1b	M0	Stage I	LIVING	48.03	DiseaseFree	48.03
559.9	TCGA-DJ-A1QE	TCGA-DJ-A1QE	FEMALE	WHITE	62	Thyroid	THCA	FEMALE	TUMOR FREE	Alive	62	[Not Available]	[Not Available]	Minimal (T3)	R0	T3	N0	M0	Stage III	LIVING	135.81	DiseaseFree	135.81
439.515	TCGA-DJ-A1QF	TCGA-DJ-A1QF	FEMALE	WHITE	61	Thyroid	THCA	FEMALE	TUMOR FREE	Alive	61	[Not Available]	[Not Available]	None	R0	T2	N0	M0	Stage II	LIVING	30.58	DiseaseFree	30.58
623.611	TCGA-DJ-A1QG	TCGA-DJ-A1QG	MALE	WHITE	62	Thyroid	THCA	MALE	TUMOR FREE	Alive	62	5	0	None	R0	T1b	N0	M0	Stage I	LIVING	44.94	DiseaseFree	44.94
455.071	TCGA-DJ-A1QH	TCGA-DJ-A1QH	FEMALE	WHITE	58	Thyroid	THCA	FEMALE	WITH TUMOR	Alive	58	8	7	Minimal (T3)	R1	T3	N1a	M0	Stage III	LIVING	42.48	DiseaseFree	42.48
569.943	TCGA-DJ-A1QI	TCGA-DJ-A1QI	FEMALE	WHITE	63	Thyroid	THCA	FEMALE	TUMOR FREE	Alive	63	[Not Available]	[Not Available]	None	R0	T2	N0	M0	Stage II	LIVING	14.95	DiseaseFree	14.95
881.379	TCGA-DJ-A1QL	TCGA-DJ-A1QL	MALE	[Not Available]	70	Thyroid	THCA	MALE	TUMOR FREE	Alive	70	[Not Available]	[Not Available]	None	R0	T2	N0	M0	Stage II	LIVING	17.58	DiseaseFree	17.58
641.148	TCGA-DJ-A1QM	TCGA-DJ-A1QM	MALE	WHITE	42	Thyroid	THCA	MALE	TUMOR FREE	Alive	42	2	0	None	R0	T1a	N0	M0	Stage I	LIVING	6.01	DiseaseFree	6.01
580.365	TCGA-DJ-A1QN	TCGA-DJ-A1QN	FEMALE	[Not Available]	42	Thyroid	THCA	FEMALE	TUMOR FREE	Alive	42	[Not Available]	[Not Available]	None	R0	T1b	N0	M0	Stage I	LIVING	42.54	DiseaseFree	42.54
590.849	TCGA-DJ-A1QO	TCGA-DJ-A1QO	MALE	WHITE	69	Thyroid	THCA	MALE	TUMOR FREE	Alive	69	[Not Available]	[Not Available]	Minimal (T3)	R0	T3	N0	M0	Stage III	LIVING	47.37	Recurred/Progressed	34.89
548.352	TCGA-DJ-A1QQ	TCGA-DJ-A1QQ	MALE	ASIAN	43	Thyroid	THCA	MALE	TUMOR FREE	Alive	43	[Not Available]	[Not Available]	Minimal (T3)	R0	T3	N0	M0	Stage I	LIVING	17.54	DiseaseFree	17.54
497.38	TCGA-DJ-A2PN	TCGA-DJ-A2PN	FEMALE	WHITE	70	Thyroid	THCA	FEMALE	TUMOR FREE	Alive	70	[Not Available]	[Not Available]	None	R0	T1b	N0	M0	Stage I	LIVING	10.09	DiseaseFree	10.09
430.697	TCGA-DJ-A2PO	TCGA-DJ-A2PO	MALE	WHITE	54	Thyroid	THCA	MALE	TUMOR FREE	Alive	54	4	0	None	R0	T1a	N0	M0	Stage I	LIVING	7.98	DiseaseFree	7.98
555.198	TCGA-DJ-A2PP	TCGA-DJ-A2PP	MALE	[Not Available]	47	Thyroid	THCA	MALE	TUMOR FREE	Alive	47	3	0	None	R0	T2	N0	M0	Stage II	LIVING	30.55	DiseaseFree	30.55
642.064	TCGA-DJ-A2PQ	TCGA-DJ-A2PQ	MALE	WHITE	26	Thyroid	THCA	MALE	TUMOR FREE	Alive	26	12	7	None	R0	T2	N1a	M0	Stage I	LIVING	35.38	DiseaseFree	35.38
398.906	TCGA-DJ-A2PR	TCGA-DJ-A2PR	MALE	ASIAN	27	Thyroid	THCA	MALE	TUMOR FREE	Alive	27	12	6	Minimal (T3)	R0	T3	N1a	M0	Stage I	LIVING	27.43	DiseaseFree	27.43
562.137	TCGA-DJ-A2PS	TCGA-DJ-A2PS	FEMALE	WHITE	40	Thyroid	THCA	FEMALE	TUMOR FREE	Alive	40	4	1	Minimal (T3)	R0	T3	N1a	M0	Stage I	LIVING	26.18	DiseaseFree	26.18
769.898	TCGA-DJ-A2PT	TCGA-DJ-A2PT	FEMALE	WHITE	70	Thyroid	THCA	FEMALE	TUMOR FREE	Alive	70	15	0	Minimal (T3)	R0	T3	N0	M0	Stage III	LIVING	38.8	DiseaseFree	38.8
397.199	TCGA-DJ-A2PU	TCGA-DJ-A2PU	FEMALE	WHITE	52	Thyroid	THCA	FEMALE	TUMOR FREE	Alive	52	1	0	None	R0	T2	N0	M0	Stage II	LIVING	33.94	DiseaseFree	33.94
470.569	TCGA-DJ-A2PV	TCGA-DJ-A2PV	FEMALE	WHITE	53	Thyroid	THCA	FEMALE	TUMOR FREE	Alive	53	7	0	None	R0	T2	N0	M0	Stage II	LIVING	31.96	DiseaseFree	31.96
522.373	TCGA-DJ-A2PW	TCGA-DJ-A2PW	MALE	WHITE	65	Thyroid	THCA	MALE	TUMOR FREE	Alive	65	1	1	None	R0	T3	N1a	M0	Stage III	LIVING	34.82	DiseaseFree	34.82
600.853	TCGA-DJ-A2PX	TCGA-DJ-A2PX	FEMALE	WHITE	55	Thyroid	THCA	FEMALE	TUMOR FREE	Alive	55	4	0	None	R0	T1b	N0	M0	Stage I	LIVING	28.94	DiseaseFree	28.94
493.056	TCGA-DJ-A2PY	TCGA-DJ-A2PY	FEMALE	WHITE	46	Thyroid	THCA	FEMALE	TUMOR FREE	Alive	46	2	1	Minimal (T3)	R0	T3	N1a	M0	Stage III	LIVING	8.77	DiseaseFree	8.77
502.383	TCGA-DJ-A2PZ	TCGA-DJ-A2PZ	MALE	WHITE	63	Thyroid	THCA	MALE	TUMOR FREE	Alive	63	1	0	Minimal (T3)	R0	T3	N0	M0	Stage III	LIVING	8.41	DiseaseFree	8.41
613.232	TCGA-DJ-A2Q0	TCGA-DJ-A2Q0	FEMALE	WHITE	57	Thyroid	THCA	FEMALE	TUMOR FREE	Alive	57	4	0	None	R0	T2	N0	M0	Stage II	LIVING	34.33	DiseaseFree	34.33
648.718	TCGA-DJ-A2Q1	TCGA-DJ-A2Q1	FEMALE	WHITE	44	Thyroid	THCA	FEMALE	TUMOR FREE	Alive	44	44	11	None	R0	T1b	N1b	M0	Stage I	LIVING	37.71	DiseaseFree	37.71
457.084	TCGA-DJ-A2Q2	TCGA-DJ-A2Q2	FEMALE	WHITE	57	Thyroid	THCA	FEMALE	TUMOR FREE	Alive	57	1	0	None	R0	T3	N0	M0	Stage III	LIVING	43.92	DiseaseFree	43.92
509.722	TCGA-DJ-A2Q3	TCGA-DJ-A2Q3	FEMALE	ASIAN	61	Thyroid	THCA	FEMALE	TUMOR FREE	Alive	61	6	1	Minimal (T3)	R0	T3	N1a	M0	Stage III	LIVING	40.21	Recurred/Progressed	12.65
601.062	TCGA-DJ-A2Q4	TCGA-DJ-A2Q4	MALE	WHITE	53	Thyroid	THCA	MALE	TUMOR FREE	Alive	53	10	1	None	R0	T1b	N1a	M0	Stage III	LIVING	33.9	DiseaseFree	33.9
507.11	TCGA-DJ-A2Q5	TCGA-DJ-A2Q5	MALE	WHITE	51	Thyroid	THCA	MALE	TUMOR FREE	Alive	51	5	2	None	R0	T2	N1b	M0	Stage IVA	LIVING	37.45	DiseaseFree	37.45
470.345	TCGA-DJ-A2Q6	TCGA-DJ-A2Q6	FEMALE	WHITE	38	Thyroid	THCA	FEMALE	TUMOR FREE	Alive	38	45	22	Minimal (T3)	R0	T1b	N1b	M0	Stage I	LIVING	36.43	DiseaseFree	36.43
689.303	TCGA-DJ-A2Q7	TCGA-DJ-A2Q7	FEMALE	ASIAN	52	Thyroid	THCA	FEMALE	TUMOR FREE	Alive	52	5	3	Minimal (T3)	R0	T2	N1a	M0	Stage III	LIVING	35.09	DiseaseFree	35.09
497.152	TCGA-DJ-A2Q9	TCGA-DJ-A2Q9	FEMALE	WHITE	65	Thyroid	THCA	FEMALE	TUMOR FREE	Alive	65	5	1	None	R0	T1b	N1a	M0	Stage III	LIVING	35.87	DiseaseFree	35.87
820.238	TCGA-DJ-A2QA	TCGA-DJ-A2QA	FEMALE	ASIAN	56	Thyroid	THCA	FEMALE	TUMOR FREE	Alive	56	1	0	Minimal (T3)	R0	T3	N0	M0	Stage III	LIVING	33.51	DiseaseFree	33.51
586.103	TCGA-DJ-A2QB	TCGA-DJ-A2QB	FEMALE	ASIAN	53	Thyroid	THCA	FEMALE	TUMOR FREE	Alive	53	54	5	Minimal (T3)	R0	T3	N1b	M0	Stage IVA	LIVING	35.15	DiseaseFree	35.15
910.6	TCGA-DJ-A2QC	TCGA-DJ-A2QC	FEMALE	[Not Available]	70	Thyroid	THCA	FEMALE	TUMOR FREE	Alive	70	[Not Available]	[Not Available]	None	R0	T2	N0	M0	Stage II	LIVING	39.91	DiseaseFree	39.91
510.689	TCGA-DJ-A3UK	TCGA-DJ-A3UK	FEMALE	WHITE	35	Thyroid	THCA	FEMALE	TUMOR FREE	Alive	35	3	0	None	R0	T1b	N0	M0	Stage I	LIVING	36.89	DiseaseFree	36.89
543.292	TCGA-DJ-A3UM	TCGA-DJ-A3UM	FEMALE	ASIAN	45	Thyroid	THCA	FEMALE	TUMOR FREE	Alive	45	3	0	None	R0	T1b	N0	M0	Stage I	LIVING	31.01	DiseaseFree	31.01
627.215	TCGA-DJ-A3UN	TCGA-DJ-A3UN	FEMALE	WHITE	51	Thyroid	THCA	FEMALE	TUMOR FREE	Alive	51	3	0	None	R0	T1b	N0	M0	Stage I	LIVING	32.39	DiseaseFree	32.39
638.181	TCGA-DJ-A3UO	TCGA-DJ-A3UO	MALE	WHITE	63	Thyroid	THCA	MALE	TUMOR FREE	Alive	63	25	6	Minimal (T3)	R0	T3	N1b	M0	Stage IVA	LIVING	31.44	Recurred/Progressed	21.06
633.484	TCGA-DJ-A3UP	TCGA-DJ-A3UP	FEMALE	[Not Available]	38	Thyroid	THCA	FEMALE	[Not Available]	Alive	38	24	0	None	R0	T2	N0	M0	Stage I	LIVING	16.39	DiseaseFree	16.39
537.881	TCGA-DJ-A3UQ	TCGA-DJ-A3UQ	FEMALE	ASIAN	45	Thyroid	THCA	FEMALE	TUMOR FREE	Alive	45	6	5	Minimal (T3)	R0	T3	N1a	M0	Stage III	LIVING	19.55	DiseaseFree	19.55
564.018	TCGA-DJ-A3UR	TCGA-DJ-A3UR	FEMALE	WHITE	51	Thyroid	THCA	FEMALE	TUMOR FREE	Alive	51	7	4	Minimal (T3)	R0	T3	N1a	M0	Stage III	LIVING	36.3	DiseaseFree	36.3
607.453	TCGA-DJ-A3US	TCGA-DJ-A3US	FEMALE	WHITE	37	Thyroid	THCA	FEMALE	TUMOR FREE	Alive	37	[Not Available]	[Not Available]	None	R0	T1b	N0	M0	Stage I	LIVING	32.79	DiseaseFree	32.79
683.282	TCGA-DJ-A3UT	TCGA-DJ-A3UT	FEMALE	WHITE	43	Thyroid	THCA	FEMALE	TUMOR FREE	Alive	43	[Not Available]	[Not Available]	None	R0	T1a	N0	M0	Stage I	LIVING	36.3	DiseaseFree	36.3
506.187	TCGA-DJ-A3UU	TCGA-DJ-A3UU	FEMALE	WHITE	49	Thyroid	THCA	FEMALE	TUMOR FREE	Alive	49	2	0	Minimal (T3)	R1	T3	N0	M0	Stage III	LIVING	23.42	DiseaseFree	23.42
561.774	TCGA-DJ-A3UW	TCGA-DJ-A3UW	FEMALE	WHITE	50	Thyroid	THCA	FEMALE	TUMOR FREE	Alive	50	4	0	None	R0	T1b	N0	M0	Stage I	LIVING	59.53	DiseaseFree	59.53
471.537	TCGA-DJ-A3UX	TCGA-DJ-A3UX	FEMALE	WHITE	46	Thyroid	THCA	FEMALE	WITH TUMOR	Alive	46	3	0	None	R0	T1	N0	M0	Stage I	LIVING	11.33	DiseaseFree	11.33
451.015	TCGA-DJ-A3UY	TCGA-DJ-A3UY	FEMALE	WHITE	32	Thyroid	THCA	FEMALE	TUMOR FREE	Alive	32	[Not Available]	[Not Available]	None	R0	T1b	N0	M0	Stage I	LIVING	35.84	DiseaseFree	35.84
570.178	TCGA-DJ-A3UZ	TCGA-DJ-A3UZ	FEMALE	WHITE	70	Thyroid	THCA	FEMALE	TUMOR FREE	Alive	70	3	0	Minimal (T3)	R0	T3	N0	M0	Stage III	LIVING	40.93	DiseaseFree	40.93
625.429	TCGA-DJ-A3V0	TCGA-DJ-A3V0	MALE	[Not Available]	56	Thyroid	THCA	MALE	TUMOR FREE	Alive	56	49	13	Moderate/Advanced (T4a)	R0	T4a	N1b	M0	Stage IVA	LIVING	36.96	DiseaseFree	36.96
640.012	TCGA-DJ-A3V2	TCGA-DJ-A3V2	FEMALE	WHITE	44	Thyroid	THCA	FEMALE	TUMOR FREE	Alive	44	4	1	None	R0	T2	N1a	M0	Stage I	LIVING	20.2	DiseaseFree	20.2
720.145	TCGA-DJ-A3V3	TCGA-DJ-A3V3	FEMALE	ASIAN	57	Thyroid	THCA	FEMALE	TUMOR FREE	Alive	57	15	0	None	R0	T2	N0	M0	Stage II	LIVING	30.58	DiseaseFree	30.58
491.537	TCGA-DJ-A3V4	TCGA-DJ-A3V4	FEMALE	WHITE	60	Thyroid	THCA	FEMALE	TUMOR FREE	Alive	60	1	1	Minimal (T3)	R0	T3	N1a	M0	Stage III	LIVING	42.51	DiseaseFree	42.51
548.36	TCGA-DJ-A3V5	TCGA-DJ-A3V5	FEMALE	WHITE	76	Thyroid	THCA	FEMALE	TUMOR FREE	Alive	76	1	0	Minimal (T3)	R1	T3	N0	M0	Stage III	LIVING	19.19	DiseaseFree	19.19
721.832	TCGA-DJ-A3V7	TCGA-DJ-A3V7	FEMALE	WHITE	44	Thyroid	THCA	FEMALE	TUMOR FREE	Alive	44	2	0	Minimal (T3)	R0	T3	N0	M0	Stage III	LIVING	23.19	DiseaseFree	23.19
657.748	TCGA-DJ-A3V8	TCGA-DJ-A3V8	FEMALE	WHITE	28	Thyroid	THCA	FEMALE	TUMOR FREE	Alive	28	16	8	Minimal (T3)	R0	T3	N1b	M0	Stage I	LIVING	21.25	DiseaseFree	21.25
540.88	TCGA-DJ-A3V9	TCGA-DJ-A3V9	FEMALE	WHITE	50	Thyroid	THCA	FEMALE	TUMOR FREE	Alive	50	56	12	None	R0	T2	N1b	M0	Stage IVA	LIVING	20.47	DiseaseFree	20.47
466.942	TCGA-DJ-A3VA	TCGA-DJ-A3VA	FEMALE	[Not Available]	39	Thyroid	THCA	FEMALE	TUMOR FREE	Alive	39	28	1	None	R0	T1b	N1a	M0	Stage I	LIVING	24.8	DiseaseFree	24.8
710.003	TCGA-DJ-A3VB	TCGA-DJ-A3VB	MALE	[Not Available]	52	Thyroid	THCA	MALE	TUMOR FREE	Alive	52	1	1	Minimal (T3)	R0	T3	N1a	M0	Stage III	LIVING	22.9	DiseaseFree	22.9
271.92	TCGA-DJ-A3VD	TCGA-DJ-A3VD	FEMALE	WHITE	32	Thyroid	THCA	FEMALE	TUMOR FREE	Alive	32	14	6	None	R0	T1b	N1a	M0	Stage I	LIVING	40.67	DiseaseFree	40.67
480.215	TCGA-DJ-A3VE	TCGA-DJ-A3VE	MALE	WHITE	50	Thyroid	THCA	MALE	TUMOR FREE	Alive	50	[Not Available]	[Not Available]	None	R0	T1b	N0	M0	Stage I	LIVING	18.96	DiseaseFree	18.96
467.139	TCGA-DJ-A3VF	TCGA-DJ-A3VF	FEMALE	WHITE	60	Thyroid	THCA	FEMALE	TUMOR FREE	Alive	60	12	4	Minimal (T3)	R0	T3	N1b	M0	Stage IVA	LIVING	9.59	DiseaseFree	9.59
739.167	TCGA-DJ-A3VG	TCGA-DJ-A3VG	MALE	WHITE	40	Thyroid	THCA	MALE	TUMOR FREE	Alive	40	1	0	None	R0	T1b	N0	M0	Stage I	LIVING	35.64	DiseaseFree	35.64
691.777	TCGA-DJ-A3VI	TCGA-DJ-A3VI	FEMALE	WHITE	52	Thyroid	THCA	FEMALE	TUMOR FREE	Alive	52	5	3	None	R0	T1b	N1a	M0	Stage III	LIVING	3.12	DiseaseFree	3.12
726.296	TCGA-DJ-A3VJ	TCGA-DJ-A3VJ	MALE	WHITE	22	Thyroid	THCA	MALE	TUMOR FREE	Alive	22	5	5	Minimal (T3)	R0	T3	N1a	M0	Stage I	LIVING	36.4	DiseaseFree	36.4
679.084	TCGA-DJ-A3VK	TCGA-DJ-A3VK	MALE	WHITE	63	Thyroid	THCA	MALE	[Not Available]	Alive	63	2	0	Minimal (T3)	R0	T3	N0	M0	Stage III	LIVING	24.74	DiseaseFree	24.74
864.641	TCGA-DJ-A3VL	TCGA-DJ-A3VL	MALE	WHITE	38	Thyroid	THCA	MALE	TUMOR FREE	Alive	38	1	0	None	R0	T1a	N0	M0	Stage I	LIVING	23.42	Recurred/Progressed	20.96
531.25	TCGA-DJ-A3VM	TCGA-DJ-A3VM	FEMALE	WHITE	68	Thyroid	THCA	FEMALE	TUMOR FREE	Alive	68	[Not Available]	[Not Available]	None	R0	T2	N0	M0	Stage II	LIVING	27.6	DiseaseFree	27.6
820.893	TCGA-DJ-A4UL	TCGA-DJ-A4UL	FEMALE	WHITE	68	Thyroid	THCA	FEMALE	TUMOR FREE	Alive	68	3	0	None	R0	T1b	N0	M0	Stage I	LIVING	30.85	DiseaseFree	30.85
618.02	TCGA-DJ-A4UP	TCGA-DJ-A4UP	FEMALE	WHITE	15	Thyroid	THCA	FEMALE	TUMOR FREE	Alive	15	49	5	None	R0	T1b	N1b	M0	Stage I	LIVING	30.09	DiseaseFree	30.09
526.906	TCGA-DJ-A4UQ	TCGA-DJ-A4UQ	MALE	ASIAN	60	Thyroid	THCA	MALE	WITH TUMOR	Alive	60	99	31	Minimal (T3)	R0	T3	N1b	M0	Stage IVA	LIVING	33.02	DiseaseFree	33.02
701.437	TCGA-DJ-A4UR	TCGA-DJ-A4UR	FEMALE	ASIAN	36	Thyroid	THCA	FEMALE	[Not Available]	Alive	36	23	11	Minimal (T3)	R0	T3	N1b	M1	Stage II	LIVING	34.76	Recurred/Progressed	3.71
465.278	TCGA-DJ-A4UT	TCGA-DJ-A4UT	FEMALE	WHITE	32	Thyroid	THCA	FEMALE	TUMOR FREE	Alive	32	[Not Available]	[Not Available]	None	R0	T1a	N0	M0	Stage I	LIVING	27.04	DiseaseFree	27.04
546.814	TCGA-DJ-A4UW	TCGA-DJ-A4UW	FEMALE	ASIAN	34	Thyroid	THCA	FEMALE	TUMOR FREE	Alive	34	25	13	None	R1	T1a	N1b	M0	Stage I	LIVING	26.91	DiseaseFree	26.91
502.76	TCGA-DJ-A4V0	TCGA-DJ-A4V0	FEMALE	ASIAN	36	Thyroid	THCA	FEMALE	TUMOR FREE	Alive	36	[Not Available]	[Not Available]	None	R0	T2	N0	M0	Stage I	LIVING	35.51	DiseaseFree	35.51
493.253	TCGA-DJ-A4V2	TCGA-DJ-A4V2	FEMALE	[Not Available]	38	Thyroid	THCA	FEMALE	TUMOR FREE	Alive	38	1	0	None	R0	T2	N0	M0	Stage I	LIVING	3.12	DiseaseFree	3.12
575.597	TCGA-DJ-A4V4	TCGA-DJ-A4V4	FEMALE	WHITE	48	Thyroid	THCA	FEMALE	TUMOR FREE	Alive	48	[Not Available]	[Not Available]	None	R0	T1a	N0	M0	Stage I	LIVING	15.8	DiseaseFree	15.8
579.647	TCGA-DJ-A4V5	TCGA-DJ-A4V5	MALE	WHITE	55	Thyroid	THCA	MALE	TUMOR FREE	Alive	55	82	30	Minimal (T3)	R0	T3	N1b	M0	Stage IVA	LIVING	35.35	DiseaseFree	35.35
556.33	TCGA-DO-A1JZ	TCGA-DO-A1JZ	FEMALE	BLACK OR AFRICAN AMERICAN	23	Thyroid	THCA	FEMALE	TUMOR FREE	Alive	23	[Not Available]	[Not Available]	None	R1	T2	NX	MX	Stage I	LIVING	54.86	DiseaseFree	54.86
486.466	TCGA-DO-A1K0	TCGA-DO-A1K0	FEMALE	WHITE	30	Thyroid	THCA	FEMALE	TUMOR FREE	Alive	30	14	9	Minimal (T3)	R0	T3	N1b	MX	Stage I	LIVING	21.52	Recurred/Progressed	18.96
400.978	TCGA-DO-A2HM	TCGA-DO-A2HM	MALE	WHITE	49	Thyroid	THCA	MALE	[Not Available]	Alive	49	5	3	None	RX	T1b	N1b	MX	Stage IVA	LIVING	2.33	DiseaseFree	2.33
504.977	TCGA-E3-A3DY	TCGA-E3-A3DY	MALE	WHITE	37	Thyroid	THCA	MALE	TUMOR FREE	Alive	37	5	4	None	R0	T3	N1a	M0	Stage I	LIVING	92.48	DiseaseFree	92.48
643.359	TCGA-E3-A3DZ	TCGA-E3-A3DZ	FEMALE	WHITE	55	Thyroid	THCA	FEMALE	TUMOR FREE	Alive	55	1	0	None	R0	T3	N0	M0	Stage III	LIVING	47.17	DiseaseFree	47.17
681.896	TCGA-E3-A3E0	TCGA-E3-A3E0	FEMALE	WHITE	34	Thyroid	THCA	FEMALE	TUMOR FREE	Alive	34	3	0	None	R0	T2	N0	MX	Stage I	LIVING	66.33	DiseaseFree	66.33
548.106	TCGA-E3-A3E1	TCGA-E3-A3E1	FEMALE	WHITE	46	Thyroid	THCA	FEMALE	TUMOR FREE	Alive	46	2	0	None	R0	T1	N0	M0	Stage I	LIVING	80.45	DiseaseFree	80.45
653.667	TCGA-E3-A3E2	TCGA-E3-A3E2	FEMALE	WHITE	34	Thyroid	THCA	FEMALE	TUMOR FREE	Alive	34	8	2	None	R0	T1	N1a	MX	Stage I	LIVING	63.14	DiseaseFree	63.14
500.517	TCGA-E3-A3E3	TCGA-E3-A3E3	FEMALE	WHITE	49	Thyroid	THCA	FEMALE	WITH TUMOR	Alive	49	1	0	None	R0	T2	N0	M0	Stage II	LIVING	52.4	Recurred/Progressed	14.62
636.014	TCGA-E3-A3E5	TCGA-E3-A3E5	MALE	WHITE	57	Thyroid	THCA	MALE	TUMOR FREE	Alive	57	28	13	None	RX	T4a	N1b	MX	Stage IVA	LIVING	39.91	DiseaseFree	39.91
642.882	TCGA-E8-A242	TCGA-E8-A242	FEMALE	WHITE	56	Thyroid	THCA	FEMALE	TUMOR FREE	Alive	56	1	0	Minimal (T3)	R1	T3	N0	MX	Stage III	LIVING	31.21	DiseaseFree	31.21
572.271	TCGA-E8-A2EA	TCGA-E8-A2EA	FEMALE	WHITE	52	Thyroid	THCA	FEMALE	TUMOR FREE	Alive	52	12	0	None	R0	T1b	N0	M0	Stage I	LIVING	35.64	DiseaseFree	35.64
610.803	TCGA-E8-A2JQ	TCGA-E8-A2JQ	FEMALE	WHITE	18	Thyroid	THCA	FEMALE	TUMOR FREE	Alive	18	14	11	Minimal (T3)	[Not Available]	T3	N1a	M0	Stage I	LIVING	11.7	DiseaseFree	11.7
714.848	TCGA-E8-A3X7	TCGA-E8-A3X7	FEMALE	WHITE	57	Thyroid	THCA	FEMALE	WITH TUMOR	Alive	57	[Not Available]	[Not Available]	Moderate/Advanced (T4a)	RX	T4a	N0	M0	Stage IVA	LIVING	31.24	DiseaseFree	31.24
442.138	TCGA-E8-A413	TCGA-E8-A413	FEMALE	ASIAN	38	Thyroid	THCA	FEMALE	TUMOR FREE	Alive	38	[Not Available]	[Not Available]	None	R0	T1b	N0	M0	Stage I	LIVING	29.96	DiseaseFree	29.96
383.889	TCGA-E8-A414	TCGA-E8-A414	FEMALE	ASIAN	45	Thyroid	THCA	FEMALE	TUMOR FREE	Alive	45	1	0	None	R0	T3	N0	M0	Stage III	LIVING	31.47	DiseaseFree	31.47
527.738	TCGA-E8-A415	TCGA-E8-A415	FEMALE	ASIAN	39	Thyroid	THCA	FEMALE	TUMOR FREE	Alive	39	2	1	None	R0	T1a	N1b	M0	Stage I	LIVING	31.01	DiseaseFree	31.01
546.551	TCGA-E8-A416	TCGA-E8-A416	FEMALE	ASIAN	51	Thyroid	THCA	FEMALE	TUMOR FREE	Alive	51	[Not Available]	[Not Available]	None	R0	T1b	N0	M0	Stage I	LIVING	31.27	DiseaseFree	31.27
456.88	TCGA-E8-A417	TCGA-E8-A417	FEMALE	ASIAN	38	Thyroid	THCA	FEMALE	TUMOR FREE	Alive	38	2	2	None	R0	T2	N1a	M0	Stage I	LIVING	30.81	DiseaseFree	30.81
671.778	TCGA-E8-A418	TCGA-E8-A418	FEMALE	WHITE	75	Thyroid	THCA	FEMALE	TUMOR FREE	Alive	75	[Not Available]	[Not Available]	Moderate/Advanced (T4a)	RX	T4a	N0	M0	Stage IVA	LIVING	3.02	DiseaseFree	3.02
568.003	TCGA-E8-A419	TCGA-E8-A419	FEMALE	WHITE	30	Thyroid	THCA	FEMALE	WITH TUMOR	Alive	30	5	1	None	R0	T2	N1	M0	Stage I	LIVING	25.43	DiseaseFree	25.43
657.271	TCGA-E8-A432	TCGA-E8-A432	FEMALE	ASIAN	57	Thyroid	THCA	FEMALE	TUMOR FREE	Alive	57	[Not Available]	[Not Available]	None	R0	T2	N0	M0	Stage II	LIVING	30.58	Recurred/Progressed	23.65
794.114	TCGA-E8-A433	TCGA-E8-A433	FEMALE	ASIAN	25	Thyroid	THCA	FEMALE	TUMOR FREE	Alive	25	2	0	None	R0	T2	N0	M0	Stage I	LIVING	31.24	DiseaseFree	31.24
554.6	TCGA-E8-A434	TCGA-E8-A434	FEMALE	ASIAN	56	Thyroid	THCA	FEMALE	TUMOR FREE	Alive	56	[Not Available]	[Not Available]	None	R0	T1a	N0	M0	Stage I	LIVING	31.31	DiseaseFree	31.31
536.147	TCGA-E8-A436	TCGA-E8-A436	FEMALE	ASIAN	53	Thyroid	THCA	FEMALE	TUMOR FREE	Alive	53	10	1	None	R0	T2	N1b	M0	Stage IVA	LIVING	14.95	DiseaseFree	14.95
670.922	TCGA-E8-A437	TCGA-E8-A437	FEMALE	WHITE	57	Thyroid	THCA	FEMALE	TUMOR FREE	Alive	57	[Not Available]	[Not Available]	None	RX	TX	NX	M0	Stage I	LIVING	39.85	DiseaseFree	39.85
906.305	TCGA-E8-A438	TCGA-E8-A438	FEMALE	WHITE	23	Thyroid	THCA	FEMALE	TUMOR FREE	Alive	23	3	0	None	R0	T1b	N0	M0	Stage I	LIVING	33.48	DiseaseFree	33.48
586.354	TCGA-E8-A44K	TCGA-E8-A44K	FEMALE	ASIAN	50	Thyroid	THCA	FEMALE	TUMOR FREE	Alive	50	3	0	None	R0	T1b	N0	M0	Stage I	LIVING	30.98	DiseaseFree	30.98
534.03	TCGA-E8-A44M	TCGA-E8-A44M	FEMALE	ASIAN	23	Thyroid	THCA	FEMALE	TUMOR FREE	Alive	23	[Not Available]	[Not Available]	None	R0	T1b	N0	M0	Stage I	LIVING	30.12	DiseaseFree	30.12
548.791	TCGA-EL-A3CL	TCGA-EL-A3CL	FEMALE	WHITE	70	Thyroid	THCA	FEMALE	[Not Available]	Dead	70	[Not Available]	[Not Available]	None	R0	T2	NX	M0	Stage II	DECEASED	31.64	[Not Available]
411.813	TCGA-EL-A3CM	TCGA-EL-A3CM	FEMALE	WHITE	64	Thyroid	THCA	FEMALE	[Not Available]	Dead	64	16	3	Minimal (T3)	R1	T3	N1b	M0	Stage III	DECEASED	26.71	[Not Available]
489.618	TCGA-EL-A3CN	TCGA-EL-A3CN	FEMALE	WHITE	47	Thyroid	THCA	FEMALE	TUMOR FREE	Alive	47	1	0	Minimal (T3)	R2	T3	N0	M0	Stage II	LIVING	155.42	DiseaseFree	155.42
445.021	TCGA-EL-A3CO	TCGA-EL-A3CO	MALE	WHITE	88	Thyroid	THCA	MALE	[Not Available]	Dead	88	41	10	Minimal (T3)	R1	T3	N1b	M0	Stage III	DECEASED	97.67	[Not Available]
509.454	TCGA-EL-A3CP	TCGA-EL-A3CP	FEMALE	BLACK OR AFRICAN AMERICAN	50	Thyroid	THCA	FEMALE	TUMOR FREE	Alive	50	[Not Available]	[Not Available]	None	RX	T1	NX	M0	[Not Available]	LIVING	158.71	DiseaseFree	158.71
697.593	TCGA-EL-A3CR	TCGA-EL-A3CR	FEMALE	WHITE	78	Thyroid	THCA	FEMALE	[Not Available]	Dead	78	32	8	Minimal (T3)	R1	T3	N1b	M0	Stage III	DECEASED	7.65	[Not Available]
430.45	TCGA-EL-A3CS	TCGA-EL-A3CS	FEMALE	WHITE	62	Thyroid	THCA	FEMALE	WITH TUMOR	Dead	62	20	0	Moderate/Advanced (T4a)	R0	T4a	N0	M0	Stage IVA	DECEASED	45.5	[Not Available]
599.551	TCGA-EL-A3CT	TCGA-EL-A3CT	FEMALE	WHITE	78	Thyroid	THCA	FEMALE	[Not Available]	Dead	78	17	2	Moderate/Advanced (T4a)	R0	T4a	N1a	M0	Stage IVA	DECEASED	60.91	[Not Available]
422.53	TCGA-EL-A3CU	TCGA-EL-A3CU	FEMALE	WHITE	70	Thyroid	THCA	FEMALE	TUMOR FREE	Alive	70	7	4	None	R0	T1	N1a	M0	Stage III	LIVING	157.03	DiseaseFree	157.03
442.309	TCGA-EL-A3CV	TCGA-EL-A3CV	MALE	WHITE	40	Thyroid	THCA	MALE	TUMOR FREE	Alive	40	38	9	Minimal (T3)	R1	T3	N1b	M0	Stage I	LIVING	37.91	DiseaseFree	37.91
477.307	TCGA-EL-A3CW	TCGA-EL-A3CW	FEMALE	WHITE	87	Thyroid	THCA	FEMALE	[Not Available]	Dead	87	21	14	None	R0	T2	N1a	M0	Stage III	DECEASED	56.96	[Not Available]
570.833	TCGA-EL-A3CX	TCGA-EL-A3CX	FEMALE	WHITE	22	Thyroid	THCA	FEMALE	TUMOR FREE	Alive	22	13	0	None	R0	T2	N0	M0	Stage I	LIVING	106.54	DiseaseFree	106.54
425.943	TCGA-EL-A3CY	TCGA-EL-A3CY	MALE	WHITE	28	Thyroid	THCA	MALE	TUMOR FREE	Alive	28	12	12	None	R0	TX	N1b	M0	Stage I	LIVING	4.17	DiseaseFree	4.17
495.327	TCGA-EL-A3CZ	TCGA-EL-A3CZ	FEMALE	WHITE	37	Thyroid	THCA	FEMALE	TUMOR FREE	Alive	37	7	1	None	R1	T1	N1a	M0	Stage I	LIVING	79.43	Recurred/Progressed	46.85
745.239	TCGA-EL-A3D0	TCGA-EL-A3D0	MALE	WHITE	61	Thyroid	THCA	MALE	WITH TUMOR	Alive	61	37	9	Moderate/Advanced (T4a)	R2	T4	N1b	M0	Stage III	LIVING	139.75	DiseaseFree	139.75
828.132	TCGA-EL-A3D1	TCGA-EL-A3D1	MALE	ASIAN	39	Thyroid	THCA	MALE	TUMOR FREE	Alive	39	19	0	None	R0	T2	N0	M0	Stage I	LIVING	98.46	DiseaseFree	98.46
811.354	TCGA-EL-A3D4	TCGA-EL-A3D4	MALE	BLACK OR AFRICAN AMERICAN	62	Thyroid	THCA	MALE	TUMOR FREE	Alive	62	75	31	Minimal (T3)	R0	T3	N1b	M0	Stage IVA	LIVING	69.51	DiseaseFree	69.51
784.149	TCGA-EL-A3D5	TCGA-EL-A3D5	FEMALE	WHITE	44	Thyroid	THCA	FEMALE	TUMOR FREE	Alive	44	30	15	Minimal (T3)	R1	T3	N1b	M0	Stage I	LIVING	57.06	DiseaseFree	57.06
772.389	TCGA-EL-A3D6	TCGA-EL-A3D6	FEMALE	WHITE	51	Thyroid	THCA	FEMALE	[Not Available]	Alive	51	5	1	Minimal (T3)	R1	T3	N1b	M0	Stage III	LIVING	108.28	DiseaseFree	108.28
697.531	TCGA-EL-A3GO	TCGA-EL-A3GO	FEMALE	WHITE	31	Thyroid	THCA	FEMALE	TUMOR FREE	Alive	31	4	0	None	R0	T2	N0	M0	Stage I	LIVING	64.82	Recurred/Progressed	0.2
980.201	TCGA-EL-A3GP	TCGA-EL-A3GP	MALE	BLACK OR AFRICAN AMERICAN	70	Thyroid	THCA	MALE	[Not Available]	Alive	70	15	7	Minimal (T3)	R0	T3	N1a	M0	Stage III	LIVING	49.47	DiseaseFree	49.47
449.134	TCGA-EL-A3GQ	TCGA-EL-A3GQ	FEMALE	WHITE	72	Thyroid	THCA	FEMALE	TUMOR FREE	Alive	72	1	0	None	R0	T1	N0	M0	Stage I	LIVING	50.2	DiseaseFree	50.2
431.773	TCGA-EL-A3GR	TCGA-EL-A3GR	FEMALE	WHITE	31	Thyroid	THCA	FEMALE	TUMOR FREE	Alive	31	[Not Available]	[Not Available]	Minimal (T3)	R0	T3	NX	M0	Stage I	LIVING	115.01	DiseaseFree	115.01
461.306	TCGA-EL-A3GS	TCGA-EL-A3GS	FEMALE	WHITE	37	Thyroid	THCA	FEMALE	TUMOR FREE	Alive	37	1	1	Minimal (T3)	R0	T3	N1	M0	Stage I	LIVING	65.34	DiseaseFree	65.34
655.05	TCGA-EL-A3GU	TCGA-EL-A3GU	FEMALE	WHITE	72	Thyroid	THCA	FEMALE	WITH TUMOR	Alive	72	23	10	Minimal (T3)	R0	T3	N1	M0	Stage III	LIVING	135.91	Recurred/Progressed	17.87
542.298	TCGA-EL-A3GV	TCGA-EL-A3GV	FEMALE	WHITE	65	Thyroid	THCA	FEMALE	TUMOR FREE	Alive	65	1	0	Minimal (T3)	R0	T3	N0	M0	Stage III	LIVING	50.33	DiseaseFree	50.33
736.932	TCGA-EL-A3GW	TCGA-EL-A3GW	FEMALE	WHITE	37	Thyroid	THCA	FEMALE	TUMOR FREE	Alive	37	[Not Available]	[Not Available]	None	R0	T2	N0	M0	Stage I	LIVING	50.16	DiseaseFree	50.16
474.182	TCGA-EL-A3GX	TCGA-EL-A3GX	FEMALE	WHITE	41	Thyroid	THCA	FEMALE	TUMOR FREE	Alive	41	40	3	None	R0	T2	N1	M0	Stage I	LIVING	147.63	Recurred/Progressed	14.42
446.31	TCGA-EL-A3GY	TCGA-EL-A3GY	FEMALE	WHITE	40	Thyroid	THCA	FEMALE	TUMOR FREE	Alive	40	[Not Available]	[Not Available]	None	R0	T1	N1	M1	Stage II	LIVING	101.05	DiseaseFree	101.05
539.638	TCGA-EL-A3GZ	TCGA-EL-A3GZ	FEMALE	WHITE	34	Thyroid	THCA	FEMALE	TUMOR FREE	Alive	34	[Not Available]	[Not Available]	None	R0	T1	N0	M0	Stage I	LIVING	139.88	DiseaseFree	139.88
864.077	TCGA-EL-A3H1	TCGA-EL-A3H1	FEMALE	BLACK OR AFRICAN AMERICAN	66	Thyroid	THCA	FEMALE	TUMOR FREE	Dead	66	[Not Available]	[Not Available]	None	R0	T1	N0	M0	Stage I	DECEASED	49.28	[Not Available]
595.774	TCGA-EL-A3H2	TCGA-EL-A3H2	MALE	WHITE	58	Thyroid	THCA	MALE	WITH TUMOR	Dead	58	[Not Available]	[Not Available]	None	R0	T2	N0	MX	Stage II	DECEASED	33.48	[Not Available]
637.415	TCGA-EL-A3H3	TCGA-EL-A3H3	FEMALE	WHITE	19	Thyroid	THCA	FEMALE	TUMOR FREE	Alive	19	19	6	None	R0	T2	N1	M0	Stage I	LIVING	43.33	DiseaseFree	43.33
599.471	TCGA-EL-A3H4	TCGA-EL-A3H4	FEMALE	BLACK OR AFRICAN AMERICAN	46	Thyroid	THCA	FEMALE	TUMOR FREE	Alive	46	69	10	Moderate/Advanced (T4a)	R0	T4a	N1	M0	Stage IVA	LIVING	49.67	DiseaseFree	49.67
823.495	TCGA-EL-A3H5	TCGA-EL-A3H5	FEMALE	WHITE	57	Thyroid	THCA	FEMALE	TUMOR FREE	Alive	57	48	6	Moderate/Advanced (T4a)	R1	T4	N1	M0	Stage IVA	LIVING	83.51	DiseaseFree	83.51
581.954	TCGA-EL-A3H7	TCGA-EL-A3H7	FEMALE	WHITE	36	Thyroid	THCA	FEMALE	TUMOR FREE	Alive	36	9	8	Minimal (T3)	R0	T3	N1	M0	Stage I	LIVING	138.9	DiseaseFree	138.9
510.68	TCGA-EL-A3H8	TCGA-EL-A3H8	FEMALE	WHITE	35	Thyroid	THCA	FEMALE	TUMOR FREE	Alive	35	44	14	Minimal (T3)	R0	T3	N1	M0	Stage I	LIVING	150.36	DiseaseFree	150.36
632.004	TCGA-EL-A3MW	TCGA-EL-A3MW	FEMALE	WHITE	55	Thyroid	THCA	FEMALE	TUMOR FREE	Alive	55	1	0	None	R0	T2	N0	M0	Stage II	LIVING	108.57	DiseaseFree	108.57
854.059	TCGA-EL-A3MX	TCGA-EL-A3MX	FEMALE	WHITE	66	Thyroid	THCA	FEMALE	WITH TUMOR	Dead	66	2	0	None	RX	T4	N1	M1	Stage IVC	DECEASED	57.59	Recurred/Progressed	56.11
636.068	TCGA-EL-A3MY	TCGA-EL-A3MY	MALE	WHITE	81	Thyroid	THCA	MALE	WITH TUMOR	Dead	81	[Not Available]	[Not Available]	Moderate/Advanced (T4a)	RX	T4	NX	M1	Stage IVC	DECEASED	17.51	[Not Available]
648.613	TCGA-EL-A3MZ	TCGA-EL-A3MZ	MALE	WHITE	66	Thyroid	THCA	MALE	TUMOR FREE	Dead	66	2	1	Moderate/Advanced (T4a)	RX	T4	N1	MX	Stage III	DECEASED	52.46	[Not Available]
467.494	TCGA-EL-A3N2	TCGA-EL-A3N2	FEMALE	WHITE	24	Thyroid	THCA	FEMALE	TUMOR FREE	Alive	24	27	5	Minimal (T3)	R0	T2	N1	M0	Stage I	LIVING	29.63	DiseaseFree	29.63
492.017	TCGA-EL-A3N3	TCGA-EL-A3N3	FEMALE	WHITE	53	Thyroid	THCA	FEMALE	TUMOR FREE	Alive	53	[Not Available]	[Not Available]	Minimal (T3)	R0	T3	NX	M0	Stage II	LIVING	178.15	DiseaseFree	178.15
610.837	TCGA-EL-A3T0	TCGA-EL-A3T0	FEMALE	WHITE	45	Thyroid	THCA	FEMALE	WITH TUMOR	Alive	45	21	10	Minimal (T3)	R0	T3	N1	M0	Stage III	LIVING	142.41	DiseaseFree	142.41
512.578	TCGA-EL-A3T1	TCGA-EL-A3T1	FEMALE	BLACK OR AFRICAN AMERICAN	38	Thyroid	THCA	FEMALE	TUMOR FREE	Alive	38	1	0	Minimal (T3)	R0	T2	N0	M0	Stage I	LIVING	129.47	DiseaseFree	129.47
503.539	TCGA-EL-A3T2	TCGA-EL-A3T2	FEMALE	WHITE	55	Thyroid	THCA	FEMALE	WITH TUMOR	Alive	55	14	2	None	R0	T2	N1	M0	Stage III	LIVING	32.46	Recurred/Progressed	31.08
577.838	TCGA-EL-A3T3	TCGA-EL-A3T3	MALE	WHITE	63	Thyroid	THCA	MALE	TUMOR FREE	Alive	63	[Not Available]	[Not Available]	None	R0	T2	N0	M0	Stage II	LIVING	131.96	DiseaseFree	131.96
635.965	TCGA-EL-A3T6	TCGA-EL-A3T6	FEMALE	WHITE	34	Thyroid	THCA	FEMALE	TUMOR FREE	Alive	34	[Not Available]	[Not Available]	None	R0	T3	N0	M0	Stage I	LIVING	98.16	DiseaseFree	98.16
564.122	TCGA-EL-A3T7	TCGA-EL-A3T7	FEMALE	WHITE	47	Thyroid	THCA	FEMALE	TUMOR FREE	Alive	47	[Not Available]	[Not Available]	Minimal (T3)	R0	T2	N0	M0	Stage II	LIVING	41.26	DiseaseFree	41.26
590.592	TCGA-EL-A3T8	TCGA-EL-A3T8	MALE	ASIAN	36	Thyroid	THCA	MALE	TUMOR FREE	Alive	36	[Not Available]	[Not Available]	None	R0	T2	N0	M0	Stage I	LIVING	107.39	DiseaseFree	107.39
133.121	TCGA-EL-A3T9	TCGA-EL-A3T9	FEMALE	WHITE	69	Thyroid	THCA	FEMALE	WITH TUMOR	Dead	69	[Not Available]	[Not Available]	Very Advanced (T4b)	R1	T4	N1	MX	Stage IV	DECEASED	5.72	[Not Available]
683.519	TCGA-EL-A3TA	TCGA-EL-A3TA	MALE	WHITE	42	Thyroid	THCA	MALE	TUMOR FREE	Alive	42	[Not Available]	[Not Available]	None	R0	T2	N0	M0	Stage I	LIVING	66.85	DiseaseFree	66.85
669.454	TCGA-EL-A3TB	TCGA-EL-A3TB	FEMALE	WHITE	47	Thyroid	THCA	FEMALE	TUMOR FREE	Alive	47	20	7	Minimal (T3)	R0	T3	N1a	M0	Stage III	LIVING	82.75	DiseaseFree	82.75
631.53	TCGA-EL-A3ZG	TCGA-EL-A3ZG	MALE	ASIAN	15	Thyroid	THCA	MALE	TUMOR FREE	Alive	15	[Not Available]	[Not Available]	Minimal (T3)	R0	T3	N0	M0	Stage I	LIVING	89.49	DiseaseFree	89.49
631.119	TCGA-EL-A3ZH	TCGA-EL-A3ZH	FEMALE	WHITE	42	Thyroid	THCA	FEMALE	TUMOR FREE	Alive	42	8	4	Minimal (T3)	R0	T3	N1	M0	Stage I	LIVING	91.1	DiseaseFree	91.1
656.512	TCGA-EL-A3ZK	TCGA-EL-A3ZK	FEMALE	WHITE	41	Thyroid	THCA	FEMALE	[Not Available]	Alive	41	16	2	None	R0	T2	N1	M0	Stage I	LIVING	51.74	DiseaseFree	51.74
657.017	TCGA-EL-A3ZL	TCGA-EL-A3ZL	FEMALE	WHITE	34	Thyroid	THCA	FEMALE	[Not Available]	Alive	34	25	7	None	R0	T1	N1	M0	Stage I	LIVING	62.25	DiseaseFree	62.25
921.733	TCGA-EL-A3ZM	TCGA-EL-A3ZM	MALE	[Not Available]	60	Thyroid	THCA	MALE	[Not Available]	Alive	60	27	7	Moderate/Advanced (T4a)	R1	T4a	N1	M0	Stage IVA	LIVING	36.01	DiseaseFree	36.01
632.54	TCGA-EL-A3ZN	TCGA-EL-A3ZN	FEMALE	WHITE	28	Thyroid	THCA	FEMALE	TUMOR FREE	Alive	28	55	6	Minimal (T3)	R0	T3	N1	M0	Stage I	LIVING	53.02	DiseaseFree	53.02
821.625	TCGA-EL-A3ZO	TCGA-EL-A3ZO	FEMALE	WHITE	79	Thyroid	THCA	FEMALE	TUMOR FREE	Alive	79	7	1	Minimal (T3)	R0	T3	N1	M0	Stage III	LIVING	72.63	DiseaseFree	72.63
516.052	TCGA-EL-A3ZP	TCGA-EL-A3ZP	MALE	WHITE	19	Thyroid	THCA	MALE	TUMOR FREE	Alive	19	47	9	Moderate/Advanced (T4a)	R0	T4	N1	M0	Stage I	LIVING	65.44	DiseaseFree	65.44
1430.15	TCGA-EL-A3ZQ	TCGA-EL-A3ZQ	FEMALE	WHITE	78	Thyroid	THCA	FEMALE	TUMOR FREE	Alive	78	1	[Not Available]	None	R0	T2	N0	M0	Stage II	LIVING	61.17	DiseaseFree	61.17
625.267	TCGA-EL-A3ZR	TCGA-EL-A3ZR	FEMALE	WHITE	46	Thyroid	THCA	FEMALE	TUMOR FREE	Alive	46	[Not Available]	[Not Available]	None	R0	T2	N0	M0	Stage II	LIVING	60.12	DiseaseFree	60.12
589.669	TCGA-EL-A3ZS	TCGA-EL-A3ZS	FEMALE	WHITE	22	Thyroid	THCA	FEMALE	TUMOR FREE	Alive	22	40	13	None	R0	T1a	N1	M0	Stage I	LIVING	7.06	DiseaseFree	7.06
568.376	TCGA-EL-A3ZT	TCGA-EL-A3ZT	MALE	WHITE	35	Thyroid	THCA	MALE	TUMOR FREE	Alive	35	[Not Available]	[Not Available]	Minimal (T3)	R0	T3	N0	M0	Stage I	LIVING	59.4	DiseaseFree	59.4
714.794	TCGA-EL-A4JV	TCGA-EL-A4JV	FEMALE	ASIAN	41	Thyroid	THCA	FEMALE	TUMOR FREE	Alive	41	1	0	None	R0	T2	N0	M0	Stage I	LIVING	57.42	DiseaseFree	57.42
453.343	TCGA-EL-A4JW	TCGA-EL-A4JW	FEMALE	WHITE	38	Thyroid	THCA	FEMALE	TUMOR FREE	Alive	38	1	0	None	R0	T1	N0	M0	Stage I	LIVING	34.69	DiseaseFree	34.69
463.165	TCGA-EL-A4JX	TCGA-EL-A4JX	FEMALE	BLACK OR AFRICAN AMERICAN	31	Thyroid	THCA	FEMALE	TUMOR FREE	Alive	31	1	0	None	R0	T3	N0	MX	Stage I	LIVING	45.93	DiseaseFree	45.93
594.586	TCGA-EL-A4JZ	TCGA-EL-A4JZ	FEMALE	WHITE	55	Thyroid	THCA	FEMALE	TUMOR FREE	Alive	55	23	6	Minimal (T3)	R0	T3	N1a	M0	Stage III	LIVING	60.97	DiseaseFree	60.97
427.181	TCGA-EL-A4K0	TCGA-EL-A4K0	FEMALE	WHITE	54	Thyroid	THCA	FEMALE	TUMOR FREE	Alive	54	1	0	None	RX	T1	N0	M0	Stage I	LIVING	31.01	DiseaseFree	31.01
582.285	TCGA-EL-A4K1	TCGA-EL-A4K1	FEMALE	WHITE	68	Thyroid	THCA	FEMALE	TUMOR FREE	Alive	68	5	3	None	R0	T3	N1	M0	Stage III	LIVING	34.36	DiseaseFree	34.36
601.543	TCGA-EL-A4K2	TCGA-EL-A4K2	FEMALE	WHITE	43	Thyroid	THCA	FEMALE	TUMOR FREE	Alive	43	1	0	None	R0	T1	N0	M0	Stage I	LIVING	30.49	DiseaseFree	30.49
583.933	TCGA-EL-A4K4	TCGA-EL-A4K4	FEMALE	WHITE	33	Thyroid	THCA	FEMALE	TUMOR FREE	Alive	33	43	13	Minimal (T3)	R0	T3	N1	M0	Stage I	LIVING	53.32	DiseaseFree	53.32
672.265	TCGA-EL-A4K6	TCGA-EL-A4K6	MALE	WHITE	75	Thyroid	THCA	MALE	TUMOR FREE	Alive	75	42	3	Minimal (T3)	R0	T4	N1	MX	Stage IV	LIVING	44.12	Recurred/Progressed	28.71
774.423	TCGA-EL-A4K7	TCGA-EL-A4K7	MALE	WHITE	74	Thyroid	THCA	MALE	TUMOR FREE	Alive	74	1	0	Minimal (T3)	R0	T2	N1	M0	Stage III	LIVING	41.1	DiseaseFree	41.1
603.716	TCGA-EL-A4K9	TCGA-EL-A4K9	MALE	WHITE	68	Thyroid	THCA	MALE	TUMOR FREE	Alive	68	[Not Available]	[Not Available]	Minimal (T3)	R0	T2	N0	M0	Stage II	LIVING	47.8	DiseaseFree	47.8
588.369	TCGA-EL-A4KD	TCGA-EL-A4KD	MALE	WHITE	41	Thyroid	THCA	MALE	TUMOR FREE	Alive	41	18	4	Minimal (T3)	R0	T3	N1	M0	Stage I	LIVING	43.56	DiseaseFree	43.56
687.352	TCGA-EL-A4KG	TCGA-EL-A4KG	FEMALE	WHITE	35	Thyroid	THCA	FEMALE	TUMOR FREE	Alive	35	1	0	Minimal (T3)	R0	T3	N0	M0	Stage I	LIVING	24.28	DiseaseFree	24.28
961.288	TCGA-EL-A4KH	TCGA-EL-A4KH	FEMALE	WHITE	36	Thyroid	THCA	FEMALE	TUMOR FREE	Alive	36	[Not Available]	[Not Available]	None	R0	T2	N0	M0	Stage I	LIVING	27.04	DiseaseFree	27.04
926.957	TCGA-EL-A4KI	TCGA-EL-A4KI	MALE	WHITE	63	Thyroid	THCA	MALE	TUMOR FREE	Alive	63	1	0	Minimal (T3)	R0	T3	N0	MX	Stage III	LIVING	23.88	Recurred/Progressed	8.71
472.45	TCGA-EM-A1CS	TCGA-EM-A1CS	FEMALE	[Not Available]	55	Thyroid	THCA	FEMALE	[Not Available]	Alive	55	6	0	None	R0	T1	N0	MX	Stage I	LIVING	26.84	DiseaseFree	26.84
420.543	TCGA-EM-A1CT	TCGA-EM-A1CT	MALE	[Not Available]	76	Thyroid	THCA	MALE	TUMOR FREE	Alive	76	22	1	None	[Not Available]	T1b	N1b	MX	Stage IVA	LIVING	18.17	DiseaseFree	18.17
595.628	TCGA-EM-A1CU	TCGA-EM-A1CU	MALE	[Not Available]	31	Thyroid	THCA	MALE	TUMOR FREE	Alive	31	20	1	None	[Not Available]	T3	N1a	M0	Stage I	LIVING	20.89	DiseaseFree	20.89
477.28	TCGA-EM-A1CV	TCGA-EM-A1CV	FEMALE	[Not Available]	32	Thyroid	THCA	FEMALE	TUMOR FREE	Alive	32	3	0	None	[Not Available]	T1	N0	MX	Stage I	LIVING	48.46	DiseaseFree	48.46
618.885	TCGA-EM-A1CW	TCGA-EM-A1CW	FEMALE	[Not Available]	39	Thyroid	THCA	FEMALE	[Not Available]	Alive	39	1	0	None	R0	T3	N0	MX	Stage I	LIVING	18.04	DiseaseFree	18.04
583.333	TCGA-EM-A1YA	TCGA-EM-A1YA	FEMALE	[Not Available]	74	Thyroid	THCA	FEMALE	TUMOR FREE	Alive	74	[Not Available]	[Not Available]	None	R0	T2	NX	MX	Stage II	LIVING	19.78	DiseaseFree	19.78
445.922	TCGA-EM-A1YB	TCGA-EM-A1YB	FEMALE	[Not Available]	73	Thyroid	THCA	FEMALE	TUMOR FREE	Alive	73	[Not Available]	[Not Available]	None	R0	T2	NX	MX	Stage II	LIVING	19.45	DiseaseFree	19.45
554.696	TCGA-EM-A1YC	TCGA-EM-A1YC	FEMALE	[Not Available]	71	Thyroid	THCA	FEMALE	TUMOR FREE	Alive	71	1	0	None	R0	T3	N0	MX	Stage III	LIVING	78.55	DiseaseFree	78.55
564.261	TCGA-EM-A1YD	TCGA-EM-A1YD	FEMALE	[Not Available]	53	Thyroid	THCA	FEMALE	TUMOR FREE	Alive	53	5	0	None	R0	T2	N0	MX	Stage II	LIVING	56.96	DiseaseFree	56.96
838.167	TCGA-EM-A1YE	TCGA-EM-A1YE	FEMALE	[Not Available]	47	Thyroid	THCA	FEMALE	TUMOR FREE	Alive	47	3	0	None	R0	T2	N0	MX	Stage II	LIVING	54.04	DiseaseFree	54.04
575.515	TCGA-EM-A22I	TCGA-EM-A22I	FEMALE	[Not Available]	52	Thyroid	THCA	FEMALE	TUMOR FREE	Alive	52	1	0	Minimal (T3)	R1	T3	N0	MX	Stage III	LIVING	14.72	DiseaseFree	14.72
571.736	TCGA-EM-A22J	TCGA-EM-A22J	FEMALE	[Not Available]	56	Thyroid	THCA	FEMALE	TUMOR FREE	Alive	56	1	0	None	RX	T2	N0	MX	Stage II	LIVING	14.49	DiseaseFree	14.49
622.142	TCGA-EM-A22K	TCGA-EM-A22K	FEMALE	[Not Available]	46	Thyroid	THCA	FEMALE	WITH TUMOR	Alive	46	83	10	None	R1	T1b	N1b	MX	Stage IVA	LIVING	15.74	DiseaseFree	15.74
620.025	TCGA-EM-A22L	TCGA-EM-A22L	FEMALE	[Not Available]	33	Thyroid	THCA	FEMALE	[Not Available]	Alive	33	1	0	None	R0	T2	N0	MX	Stage I	LIVING	10.45	DiseaseFree	10.45
642.142	TCGA-EM-A22M	TCGA-EM-A22M	MALE	ASIAN	52	Thyroid	THCA	MALE	TUMOR FREE	Alive	52	3	0	None	R0	T1b	N0	MX	Stage I	LIVING	14.52	DiseaseFree	14.52
554.258	TCGA-EM-A22N	TCGA-EM-A22N	FEMALE	[Not Available]	68	Thyroid	THCA	FEMALE	TUMOR FREE	Alive	68	2	0	None	RX	T1b	N0	MX	Stage I	LIVING	10.64	DiseaseFree	10.64
495.618	TCGA-EM-A22O	TCGA-EM-A22O	MALE	ASIAN	75	Thyroid	THCA	MALE	TUMOR FREE	Alive	75	1	1	Moderate/Advanced (T4a)	R1	T4a	N1a	MX	Stage IVA	LIVING	44.15	DiseaseFree	44.15
498.969	TCGA-EM-A22P	TCGA-EM-A22P	MALE	[Not Available]	64	Thyroid	THCA	MALE	TUMOR FREE	Alive	64	28	14	None	R1	T1b	N1b	MX	Stage IVA	LIVING	41.26	DiseaseFree	41.26
808.26	TCGA-EM-A22Q	TCGA-EM-A22Q	MALE	[Not Available]	36	Thyroid	THCA	MALE	TUMOR FREE	Alive	36	9	0	None	R0	T3	N0	MX	Stage I	LIVING	14.22	DiseaseFree	14.22
569.259	TCGA-EM-A2CJ	TCGA-EM-A2CJ	FEMALE	[Not Available]	49	Thyroid	THCA	FEMALE	TUMOR FREE	Alive	49	[Not Available]	[Not Available]	None	R0	T1b	NX	MX	Stage I	LIVING	47.54	DiseaseFree	47.54
630.837	TCGA-EM-A2CK	TCGA-EM-A2CK	MALE	[Not Available]	28	Thyroid	THCA	MALE	TUMOR FREE	Alive	28	25	6	None	R0	T2	N1b	MX	Stage I	LIVING	17.87	DiseaseFree	17.87
555.28	TCGA-EM-A2CL	TCGA-EM-A2CL	MALE	[Not Available]	31	Thyroid	THCA	MALE	TUMOR FREE	Alive	31	0	[Not Available]	None	R0	T2	NX	MX	Stage I	LIVING	13.17	DiseaseFree	13.17
369.724	TCGA-EM-A2CN	TCGA-EM-A2CN	MALE	[Not Available]	62	Thyroid	THCA	MALE	WITH TUMOR	Alive	62	3	0	None	R0	T3	N0	M1	Stage IVC	LIVING	23.49	DiseaseFree	23.49
540.007	TCGA-EM-A2CO	TCGA-EM-A2CO	FEMALE	[Not Available]	77	Thyroid	THCA	FEMALE	TUMOR FREE	Alive	77	[Not Available]	[Not Available]	None	R0	T2	NX	MX	Stage II	LIVING	6.04	DiseaseFree	6.04
478.937	TCGA-EM-A2CP	TCGA-EM-A2CP	FEMALE	[Not Available]	26	Thyroid	THCA	FEMALE	TUMOR FREE	Alive	26	27	0	None	R0	T2	N0	MX	Stage I	LIVING	2.99	DiseaseFree	2.99
470.67	TCGA-EM-A2CQ	TCGA-EM-A2CQ	FEMALE	[Not Available]	40	Thyroid	THCA	FEMALE	TUMOR FREE	Alive	40	3	1	None	R0	T1b	N1a	MX	Stage I	LIVING	12.29	DiseaseFree	12.29
649.66	TCGA-EM-A2CR	TCGA-EM-A2CR	FEMALE	[Not Available]	46	Thyroid	THCA	FEMALE	TUMOR FREE	Alive	46	3	0	None	R0	T2	N0	MX	Stage II	LIVING	13.63	DiseaseFree	13.63
499.32	TCGA-EM-A2CS	TCGA-EM-A2CS	FEMALE	[Not Available]	51	Thyroid	THCA	FEMALE	WITH TUMOR	Alive	51	49	35	None	R1	T3	N1b	MX	Stage IVA	LIVING	27.63	DiseaseFree	27.63
556.794	TCGA-EM-A2CS	TCGA-EM-A2CS	FEMALE	[Not Available]	51	Thyroid	THCA	FEMALE	WITH TUMOR	Alive	51	49	35	None	R1	T3	N1b	MX	Stage IVA	LIVING	27.63	DiseaseFree	27.63
556.505	TCGA-EM-A2CT	TCGA-EM-A2CT	FEMALE	[Not Available]	20	Thyroid	THCA	FEMALE	TUMOR FREE	Alive	20	5	0	None	R0	T1b	N0	MX	Stage I	LIVING	48.42	DiseaseFree	48.42
663.343	TCGA-EM-A2CU	TCGA-EM-A2CU	FEMALE	[Not Available]	47	Thyroid	THCA	FEMALE	TUMOR FREE	Alive	47	30	4	None	R0	T2	N1a	MX	Stage III	LIVING	13.14	DiseaseFree	13.14
539.657	TCGA-EM-A2OV	TCGA-EM-A2OV	FEMALE	ASIAN	64	Thyroid	THCA	FEMALE	TUMOR FREE	Alive	64	1	0	None	R0	T2	N0	MX	Stage II	LIVING	22.14	DiseaseFree	22.14
553.897	TCGA-EM-A2OW	TCGA-EM-A2OW	FEMALE	[Not Available]	37	Thyroid	THCA	FEMALE	TUMOR FREE	Alive	37	[Not Available]	[Not Available]	None	R0	T1b	NX	MX	Stage I	LIVING	40.31	DiseaseFree	40.31
585.522	TCGA-EM-A2OX	TCGA-EM-A2OX	MALE	[Not Available]	46	Thyroid	THCA	MALE	TUMOR FREE	Alive	46	9	8	None	R0	T1b	N1b	MX	Stage IVA	LIVING	19.71	DiseaseFree	19.71
499.841	TCGA-EM-A2OY	TCGA-EM-A2OY	FEMALE	[Not Available]	46	Thyroid	THCA	FEMALE	TUMOR FREE	Alive	46	1	0	None	R0	T2	N0	MX	Stage II	LIVING	32.29	DiseaseFree	32.29
478.695	TCGA-EM-A2OZ	TCGA-EM-A2OZ	MALE	[Not Available]	66	Thyroid	THCA	MALE	TUMOR FREE	Alive	66	2	0	None	R0	T1b	N0	MX	Stage I	LIVING	33.94	DiseaseFree	33.94
536.704	TCGA-EM-A2P0	TCGA-EM-A2P0	MALE	[Not Available]	33	Thyroid	THCA	MALE	TUMOR FREE	Alive	33	34	9	None	R0	T2	N1b	MX	Stage I	LIVING	17.58	DiseaseFree	17.58
398.01	TCGA-EM-A2P1	TCGA-EM-A2P1	MALE	[Not Available]	33	Thyroid	THCA	MALE	WITH TUMOR	Alive	33	54	15	None	R0	T2	N1b	MX	Stage I	LIVING	17.44	Recurred/Progressed	11.93
499.382	TCGA-EM-A2P1	TCGA-EM-A2P1	MALE	[Not Available]	33	Thyroid	THCA	MALE	WITH TUMOR	Alive	33	54	15	None	R0	T2	N1b	MX	Stage I	LIVING	17.44	Recurred/Progressed	11.93
999.555	TCGA-EM-A2P2	TCGA-EM-A2P2	MALE	[Not Available]	46	Thyroid	THCA	MALE	TUMOR FREE	Alive	46	5	0	None	R0	T3	N0	MX	Stage III	LIVING	17.28	DiseaseFree	17.28
540.972	TCGA-EM-A2P3	TCGA-EM-A2P3	FEMALE	[Not Available]	47	Thyroid	THCA	FEMALE	TUMOR FREE	Alive	47	[Not Available]	[Not Available]	None	R0	T1b	NX	MX	Stage I	LIVING	14.59	DiseaseFree	14.59
667.387	TCGA-EM-A3AI	TCGA-EM-A3AI	FEMALE	WHITE	67	Thyroid	THCA	FEMALE	TUMOR FREE	Alive	67	[Not Available]	[Not Available]	None	R0	T2	NX	MX	Stage II	LIVING	22.5	DiseaseFree	22.5
710.237	TCGA-EM-A3AJ	TCGA-EM-A3AJ	MALE	[Not Available]	39	Thyroid	THCA	MALE	TUMOR FREE	Alive	39	24	4	None	R1	T3	N1a	MX	Stage I	LIVING	30.91	DiseaseFree	30.91
524.459	TCGA-EM-A3AK	TCGA-EM-A3AK	FEMALE	[Not Available]	62	Thyroid	THCA	FEMALE	TUMOR FREE	Alive	62	2	0	None	R0	T1b	N0	MX	Stage I	LIVING	15.67	DiseaseFree	15.67
917.138	TCGA-EM-A3AL	TCGA-EM-A3AL	FEMALE	[Not Available]	45	Thyroid	THCA	FEMALE	TUMOR FREE	Alive	45	14	0	None	R0	T1b	N0	MX	Stage I	LIVING	14.13	DiseaseFree	14.13
625.711	TCGA-EM-A3AN	TCGA-EM-A3AN	FEMALE	[Not Available]	36	Thyroid	THCA	FEMALE	TUMOR FREE	Alive	36	80	27	None	R1	T1b	N1b	MX	Stage I	LIVING	33.05	DiseaseFree	33.05
782.032	TCGA-EM-A3AO	TCGA-EM-A3AO	MALE	[Not Available]	61	Thyroid	THCA	MALE	TUMOR FREE	Alive	61	26	10	None	R0	T2	N1b	MX	Stage IVA	LIVING	44.48	DiseaseFree	44.48
714.399	TCGA-EM-A3AP	TCGA-EM-A3AP	FEMALE	[Not Available]	31	Thyroid	THCA	FEMALE	TUMOR FREE	Alive	31	[Not Available]	[Not Available]	None	R0	T2	NX	MX	Stage I	LIVING	8.34	DiseaseFree	8.34
640.829	TCGA-EM-A3AQ	TCGA-EM-A3AQ	FEMALE	[Not Available]	85	Thyroid	THCA	FEMALE	TUMOR FREE	Alive	85	3	0	None	R0	T1b	N0	MX	Stage I	LIVING	29.7	DiseaseFree	29.7
594.765	TCGA-EM-A3AR	TCGA-EM-A3AR	MALE	[Not Available]	41	Thyroid	THCA	MALE	TUMOR FREE	Alive	41	1	1	None	R0	T1b	N1a	MX	Stage I	LIVING	37.22	DiseaseFree	37.22
687.933	TCGA-EM-A3FJ	TCGA-EM-A3FJ	FEMALE	[Not Available]	24	Thyroid	THCA	FEMALE	TUMOR FREE	Alive	24	33	12	None	R0	T1a	N1b	MX	Stage I	LIVING	27.92	DiseaseFree	27.92
612.613	TCGA-EM-A3FK	TCGA-EM-A3FK	FEMALE	[Not Available]	30	Thyroid	THCA	FEMALE	TUMOR FREE	Alive	30	25	17	None	R0	T1b	N1b	MX	Stage I	LIVING	23.75	DiseaseFree	23.75
608.614	TCGA-EM-A3FL	TCGA-EM-A3FL	FEMALE	[Not Available]	63	Thyroid	THCA	FEMALE	TUMOR FREE	Alive	63	[Not Available]	[Not Available]	None	R0	T1b	NX	MX	Stage I	LIVING	47.34	DiseaseFree	47.34
899.303	TCGA-EM-A3FM	TCGA-EM-A3FM	MALE	[Not Available]	57	Thyroid	THCA	MALE	TUMOR FREE	Alive	57	53	17	None	R0	T2	N1b	MX	Stage IVA	LIVING	20.99	Recurred/Progressed	16.89
1330.94	TCGA-EM-A3FN	TCGA-EM-A3FN	FEMALE	[Not Available]	42	Thyroid	THCA	FEMALE	TUMOR FREE	Alive	42	2	0	None	R0	T3	N0	MX	Stage I	LIVING	12.06	DiseaseFree	12.06
967.022	TCGA-EM-A3FO	TCGA-EM-A3FO	MALE	[Not Available]	40	Thyroid	THCA	MALE	TUMOR FREE	Alive	40	3	0	None	R0	T3	N0	MX	Stage I	LIVING	17.48	DiseaseFree	17.48
1124.52	TCGA-EM-A3FP	TCGA-EM-A3FP	FEMALE	[Not Available]	71	Thyroid	THCA	FEMALE	TUMOR FREE	Alive	71	3	0	None	R0	T2	N0	MX	Stage II	LIVING	17.38	DiseaseFree	17.38
765.517	TCGA-EM-A3FQ	TCGA-EM-A3FQ	FEMALE	[Not Available]	19	Thyroid	THCA	FEMALE	WITH TUMOR	Alive	19	66	41	None	R0	T3	N1b	MX	Stage I	LIVING	16.16	DiseaseFree	16.16
723.592	TCGA-EM-A3FQ	TCGA-EM-A3FQ	FEMALE	[Not Available]	19	Thyroid	THCA	FEMALE	WITH TUMOR	Alive	19	66	41	None	R0	T3	N1b	MX	Stage I	LIVING	16.16	DiseaseFree	16.16
781.969	TCGA-EM-A3FR	TCGA-EM-A3FR	FEMALE	[Not Available]	55	Thyroid	THCA	FEMALE	TUMOR FREE	Alive	55	7	2	None	R0	T2	N1a	MX	Stage III	LIVING	15.01	DiseaseFree	15.01
585.153	TCGA-EM-A3O3	TCGA-EM-A3O3	FEMALE	[Not Available]	83	Thyroid	THCA	FEMALE	TUMOR FREE	Alive	83	16	3	None	R0	T2	N1a	MX	Stage III	LIVING	14.49	DiseaseFree	14.49
836.467	TCGA-EM-A3O6	TCGA-EM-A3O6	FEMALE	[Not Available]	54	Thyroid	THCA	FEMALE	TUMOR FREE	Alive	54	[Not Available]	[Not Available]	None	R0	T2	NX	MX	Stage II	LIVING	15.05	DiseaseFree	15.05
658.216	TCGA-EM-A3O7	TCGA-EM-A3O7	FEMALE	[Not Available]	46	Thyroid	THCA	FEMALE	TUMOR FREE	Alive	46	[Not Available]	[Not Available]	None	R0	T3	NX	MX	Stage III	LIVING	7.33	DiseaseFree	7.33
746.428	TCGA-EM-A3O8	TCGA-EM-A3O8	FEMALE	[Not Available]	33	Thyroid	THCA	FEMALE	TUMOR FREE	Alive	33	3	0	None	R0	T1b	N0	MX	Stage I	LIVING	12.52	DiseaseFree	12.52
674.963	TCGA-EM-A3O9	TCGA-EM-A3O9	MALE	[Not Available]	40	Thyroid	THCA	MALE	TUMOR FREE	Alive	40	2	0	None	R0	T3	N0	MX	Stage I	LIVING	9.23	DiseaseFree	9.23
649.492	TCGA-EM-A3OA	TCGA-EM-A3OA	FEMALE	[Not Available]	55	Thyroid	THCA	FEMALE	TUMOR FREE	Alive	55	1	0	None	R0	T2	N0	MX	Stage II	LIVING	27	DiseaseFree	27
624.189	TCGA-EM-A3OB	TCGA-EM-A3OB	FEMALE	[Not Available]	33	Thyroid	THCA	FEMALE	TUMOR FREE	Alive	33	3	0	None	R0	T2	N0	MX	Stage I	LIVING	38.63	DiseaseFree	38.63
945.675	TCGA-EM-A3ST	TCGA-EM-A3ST	FEMALE	[Not Available]	62	Thyroid	THCA	FEMALE	TUMOR FREE	Alive	62	1	0	None	R0	T3	N0	MX	Stage III	LIVING	38.83	Recurred/Progressed	31.73
821.002	TCGA-EM-A3SU	TCGA-EM-A3SU	FEMALE	[Not Available]	43	Thyroid	THCA	FEMALE	TUMOR FREE	Alive	43	33	3	None	R0	T2	N1b	MX	Stage I	LIVING	29.93	DiseaseFree	29.93
570.639	TCGA-EM-A3SU	TCGA-EM-A3SU	FEMALE	[Not Available]	43	Thyroid	THCA	FEMALE	TUMOR FREE	Alive	43	33	3	None	R0	T2	N1b	MX	Stage I	LIVING	29.93	DiseaseFree	29.93
509.526	TCGA-EM-A3SX	TCGA-EM-A3SX	FEMALE	[Not Available]	28	Thyroid	THCA	FEMALE	WITH TUMOR	Alive	28	4	3	None	R1	T3	N1a	MX	Stage I	LIVING	29.83	DiseaseFree	29.83
462.568	TCGA-EM-A3SY	TCGA-EM-A3SY	MALE	[Not Available]	36	Thyroid	THCA	MALE	TUMOR FREE	Alive	36	[Not Available]	[Not Available]	None	R0	T1b	NX	MX	Stage I	LIVING	13.5	DiseaseFree	13.5
588.496	TCGA-EM-A3SZ	TCGA-EM-A3SZ	FEMALE	[Not Available]	42	Thyroid	THCA	FEMALE	TUMOR FREE	Alive	42	4	0	None	R0	T2	N0	MX	Stage I	LIVING	12.78	DiseaseFree	12.78
513.256	TCGA-EM-A4FF	TCGA-EM-A4FF	FEMALE	[Not Available]	40	Thyroid	THCA	FEMALE	TUMOR FREE	Alive	40	4	1	None	R1	T1b	N1	MX	Stage I	LIVING	84.53	Recurred/Progressed	60.94
764.429	TCGA-EM-A4FH	TCGA-EM-A4FH	MALE	[Not Available]	69	Thyroid	THCA	MALE	TUMOR FREE	Alive	69	[Not Available]	[Not Available]	None	R0	T3	NX	MX	Stage III	LIVING	29.3	DiseaseFree	29.3
514.255	TCGA-EM-A4FK	TCGA-EM-A4FK	FEMALE	[Not Available]	33	Thyroid	THCA	FEMALE	TUMOR FREE	Alive	33	[Not Available]	[Not Available]	None	R0	T2	NX	MX	Stage I	LIVING	21.32	DiseaseFree	21.32
665.265	TCGA-EM-A4FM	TCGA-EM-A4FM	FEMALE	[Not Available]	59	Thyroid	THCA	FEMALE	WITH TUMOR	Alive	59	40	12	Minimal (T3)	R1	T3	N1b	MX	Stage IVA	LIVING	5.32	DiseaseFree	5.32
683.228	TCGA-EM-A4FN	TCGA-EM-A4FN	FEMALE	[Not Available]	49	Thyroid	THCA	FEMALE	TUMOR FREE	Alive	49	32	8	None	R0	T1b	N1b	MX	Stage IVA	LIVING	26.35	DiseaseFree	26.35
516.746	TCGA-EM-A4FO	TCGA-EM-A4FO	MALE	[Not Available]	72	Thyroid	THCA	MALE	TUMOR FREE	Alive	72	6	0	None	R0	T1b	N0	MX	Stage I	LIVING	26.35	DiseaseFree	26.35
619.885	TCGA-EM-A4FQ	TCGA-EM-A4FQ	FEMALE	[Not Available]	42	Thyroid	THCA	FEMALE	TUMOR FREE	Alive	42	55	17	None	R0	T2	N1	MX	Stage I	LIVING	22.44	DiseaseFree	22.44
620.843	TCGA-EM-A4FR	TCGA-EM-A4FR	MALE	[Not Available]	28	Thyroid	THCA	MALE	TUMOR FREE	Alive	28	3	3	None	R0	T3	N1	MX	Stage I	LIVING	21.52	DiseaseFree	21.52
675.014	TCGA-EM-A4FU	TCGA-EM-A4FU	MALE	[Not Available]	35	Thyroid	THCA	MALE	TUMOR FREE	Alive	35	[Not Available]	[Not Available]	None	R0	T3	NX	MX	Stage I	LIVING	60.45	Recurred/Progressed	25.66
613.952	TCGA-EM-A4FV	TCGA-EM-A4FV	FEMALE	[Not Available]	64	Thyroid	THCA	FEMALE	TUMOR FREE	Alive	64	5	0	None	R0	T1b	N0	MX	Stage I	LIVING	24.44	DiseaseFree	24.44
507.967	TCGA-EM-A4G1	TCGA-EM-A4G1	FEMALE	[Not Available]	26	Thyroid	THCA	FEMALE	TUMOR FREE	Alive	26	2	0	None	R0	T1b	N0	MX	Stage I	LIVING	13.67	DiseaseFree	13.67
551.763	TCGA-ET-A25G	TCGA-ET-A25G	FEMALE	WHITE	56	Thyroid	THCA	FEMALE	TUMOR FREE	Alive	56	1	0	Minimal (T3)	R0	T3	N0	MX	Stage III	LIVING	81.87	DiseaseFree	81.87
804.913	TCGA-ET-A25I	TCGA-ET-A25I	FEMALE	WHITE	37	Thyroid	THCA	FEMALE	TUMOR FREE	Alive	37	1	0	None	R0	T2	N0	MX	Stage I	LIVING	81.64	DiseaseFree	81.64
415.294	TCGA-ET-A25J	TCGA-ET-A25J	FEMALE	WHITE	40	Thyroid	THCA	FEMALE	TUMOR FREE	Alive	40	18	2	None	R0	T2	N1a	MX	Stage I	LIVING	77.5	DiseaseFree	77.5
542.017	TCGA-ET-A25K	TCGA-ET-A25K	FEMALE	WHITE	36	Thyroid	THCA	FEMALE	TUMOR FREE	Alive	36	11	3	None	R0	T2	N1a	MX	Stage I	LIVING	70.37	DiseaseFree	70.37
572.395	TCGA-ET-A25L	TCGA-ET-A25L	FEMALE	WHITE	52	Thyroid	THCA	FEMALE	TUMOR FREE	Alive	52	12	2	Minimal (T3)	R1	T3	N1b	MX	Stage IVA	LIVING	56.54	DiseaseFree	56.54
481.771	TCGA-ET-A25M	TCGA-ET-A25M	MALE	WHITE	33	Thyroid	THCA	MALE	TUMOR FREE	Alive	33	2	1	None	R0	T2	N1	MX	Stage I	LIVING	60.15	DiseaseFree	60.15
493.86	TCGA-ET-A25N	TCGA-ET-A25N	FEMALE	WHITE	28	Thyroid	THCA	FEMALE	TUMOR FREE	Alive	28	8	1	None	R0	T2	N1a	MX	Stage I	LIVING	63.34	DiseaseFree	63.34
507.345	TCGA-ET-A25O	TCGA-ET-A25O	FEMALE	BLACK OR AFRICAN AMERICAN	35	Thyroid	THCA	FEMALE	TUMOR FREE	Alive	35	5	2	None	R0	T2	N1a	MX	Stage I	LIVING	65.24	DiseaseFree	65.24
594.247	TCGA-ET-A25P	TCGA-ET-A25P	FEMALE	ASIAN	24	Thyroid	THCA	FEMALE	TUMOR FREE	Alive	24	3	0	None	R0	T1	N0	MX	Stage I	LIVING	18.36	DiseaseFree	18.36
490.603	TCGA-ET-A25R	TCGA-ET-A25R	FEMALE	WHITE	51	Thyroid	THCA	FEMALE	TUMOR FREE	Alive	51	[Not Available]	[Not Available]	Minimal (T3)	R0	T3	NX	MX	Stage III	LIVING	63.4	DiseaseFree	63.4
656.662	TCGA-ET-A2MX	TCGA-ET-A2MX	MALE	WHITE	27	Thyroid	THCA	MALE	TUMOR FREE	Alive	27	4	4	None	R0	T2	N1a	MX	Stage I	LIVING	88.34	DiseaseFree	88.34
705.293	TCGA-ET-A2MX	TCGA-ET-A2MX	MALE	WHITE	27	Thyroid	THCA	MALE	TUMOR FREE	Alive	27	4	4	None	R0	T2	N1a	MX	Stage I	LIVING	88.34	DiseaseFree	88.34
542.146	TCGA-ET-A2MY	TCGA-ET-A2MY	FEMALE	BLACK OR AFRICAN AMERICAN	72	Thyroid	THCA	FEMALE	TUMOR FREE	Alive	72	[Not Available]	[Not Available]	None	R0	T1b	NX	MX	Stage I	LIVING	58.71	DiseaseFree	58.71
591.309	TCGA-ET-A2MZ	TCGA-ET-A2MZ	MALE	WHITE	39	Thyroid	THCA	MALE	TUMOR FREE	Alive	39	6	0	None	RX	T1b	N0	MX	Stage I	LIVING	37.22	DiseaseFree	37.22
1004.29	TCGA-ET-A2N0	TCGA-ET-A2N0	FEMALE	WHITE	51	Thyroid	THCA	FEMALE	TUMOR FREE	Alive	51	27	20	None	R0	T1b	N1a	MX	Stage III	LIVING	52.56	DiseaseFree	52.56
868.778	TCGA-ET-A2N3	TCGA-ET-A2N3	FEMALE	WHITE	34	Thyroid	THCA	FEMALE	TUMOR FREE	Alive	34	[Not Available]	[Not Available]	None	RX	T2	NX	MX	Stage I	LIVING	83.28	DiseaseFree	83.28
704.631	TCGA-ET-A2N4	TCGA-ET-A2N4	FEMALE	WHITE	53	Thyroid	THCA	FEMALE	TUMOR FREE	Alive	53	2	0	Minimal (T3)	RX	T3	N0	MX	Stage III	LIVING	2.66	DiseaseFree	2.66
668.471	TCGA-ET-A2N5	TCGA-ET-A2N5	FEMALE	BLACK OR AFRICAN AMERICAN	46	Thyroid	THCA	FEMALE	TUMOR FREE	Alive	46	[Not Available]	[Not Available]	Minimal (T3)	RX	T3	NX	MX	Stage III	LIVING	80.81	DiseaseFree	80.81
550.636	TCGA-ET-A39I	TCGA-ET-A39I	FEMALE	WHITE	83	Thyroid	THCA	FEMALE	TUMOR FREE	Dead	83	[Not Available]	[Not Available]	None	R0	T1	NX	MX	Stage I	DECEASED	33.21	[Not Available]
487.936	TCGA-ET-A39J	TCGA-ET-A39J	FEMALE	WHITE	23	Thyroid	THCA	FEMALE	TUMOR FREE	Alive	23	[Not Available]	[Not Available]	None	R0	T2	NX	MX	Stage I	LIVING	106.01	DiseaseFree	106.01
699.052	TCGA-ET-A39K	TCGA-ET-A39K	FEMALE	WHITE	48	Thyroid	THCA	FEMALE	TUMOR FREE	Alive	48	14	11	Minimal (T3)	R1	T3	N1a	MX	Stage III	LIVING	107.33	Recurred/Progressed	41.03
543.944	TCGA-ET-A39L	TCGA-ET-A39L	FEMALE	[Not Available]	20	Thyroid	THCA	FEMALE	TUMOR FREE	Alive	20	4	0	None	R0	T3	N0	MX	Stage I	LIVING	108.38	DiseaseFree	108.38
665.457	TCGA-ET-A39M	TCGA-ET-A39M	MALE	WHITE	34	Thyroid	THCA	MALE	TUMOR FREE	Alive	34	[Not Available]	[Not Available]	None	R0	T2	NX	MX	Stage I	LIVING	84.82	DiseaseFree	84.82
600.291	TCGA-ET-A39N	TCGA-ET-A39N	FEMALE	WHITE	35	Thyroid	THCA	FEMALE	TUMOR FREE	Alive	35	[Not Available]	[Not Available]	None	R0	T3	NX	MX	Stage I	LIVING	123.23	DiseaseFree	123.23
477.966	TCGA-ET-A39O	TCGA-ET-A39O	MALE	WHITE	39	Thyroid	THCA	MALE	TUMOR FREE	Alive	39	4	0	None	R0	T1	N0	MX	Stage I	LIVING	100.49	DiseaseFree	100.49
552.108	TCGA-ET-A39P	TCGA-ET-A39P	FEMALE	BLACK OR AFRICAN AMERICAN	73	Thyroid	THCA	FEMALE	TUMOR FREE	Alive	73	2	0	Minimal (T3)	R1	T3	N0	MX	Stage III	LIVING	95.27	DiseaseFree	95.27
638.635	TCGA-ET-A39R	TCGA-ET-A39R	FEMALE	WHITE	24	Thyroid	THCA	FEMALE	TUMOR FREE	Alive	24	18	0	None	R0	T1	N0	MX	Stage I	LIVING	94.05	DiseaseFree	94.05
591.859	TCGA-ET-A39S	TCGA-ET-A39S	FEMALE	WHITE	27	Thyroid	THCA	FEMALE	TUMOR FREE	Alive	27	2	0	None	R0	T1	N0	MX	Stage I	LIVING	55.06	DiseaseFree	55.06
492.248	TCGA-ET-A39T	TCGA-ET-A39T	FEMALE	WHITE	55	Thyroid	THCA	FEMALE	TUMOR FREE	Alive	55	2	0	Minimal (T3)	R0	T3	N0	MX	Stage III	LIVING	98.13	DiseaseFree	98.13
472.895	TCGA-ET-A3BN	TCGA-ET-A3BN	FEMALE	ASIAN	33	Thyroid	THCA	FEMALE	TUMOR FREE	Alive	33	[Not Available]	[Not Available]	None	R0	T2	NX	MX	Stage I	LIVING	28.22	DiseaseFree	28.22
418.256	TCGA-ET-A3BO	TCGA-ET-A3BO	FEMALE	WHITE	44	Thyroid	THCA	FEMALE	TUMOR FREE	Alive	44	10	2	Minimal (T3)	R1	T3	N1a	MX	Stage I	LIVING	50.36	DiseaseFree	50.36
607.169	TCGA-ET-A3BP	TCGA-ET-A3BP	FEMALE	WHITE	34	Thyroid	THCA	FEMALE	TUMOR FREE	Alive	34	3	2	None	R0	T2	N1a	MX	Stage I	LIVING	79.04	DiseaseFree	79.04
573.405	TCGA-ET-A3BQ	TCGA-ET-A3BQ	FEMALE	WHITE	27	Thyroid	THCA	FEMALE	TUMOR FREE	Alive	27	2	0	None	R0	T2	N0	MX	Stage I	LIVING	76.58	DiseaseFree	76.58
692.067	TCGA-ET-A3BS	TCGA-ET-A3BS	MALE	ASIAN	42	Thyroid	THCA	MALE	TUMOR FREE	Alive	42	17	8	Minimal (T3)	R0	T3	N1a	MX	Stage I	LIVING	5.78	DiseaseFree	5.78
405.91	TCGA-ET-A3BT	TCGA-ET-A3BT	FEMALE	WHITE	60	Thyroid	THCA	FEMALE	TUMOR FREE	Alive	60	7	2	None	R0	T2	N1b	MX	Stage IVA	LIVING	87.55	Recurred/Progressed	8.77
539.237	TCGA-ET-A3BU	TCGA-ET-A3BU	MALE	WHITE	28	Thyroid	THCA	MALE	TUMOR FREE	Alive	28	9	6	None	R0	T1	N1a	MX	Stage I	LIVING	77.76	DiseaseFree	77.76
582.453	TCGA-ET-A3BV	TCGA-ET-A3BV	FEMALE	WHITE	47	Thyroid	THCA	FEMALE	TUMOR FREE	Alive	47	17	2	None	R0	T2	N1a	MX	Stage III	LIVING	75.36	Recurred/Progressed	42.02
429.547	TCGA-ET-A3BW	TCGA-ET-A3BW	FEMALE	WHITE	30	Thyroid	THCA	FEMALE	TUMOR FREE	Alive	30	[Not Available]	[Not Available]	None	R0	T2	NX	MX	Stage I	LIVING	46.62	DiseaseFree	46.62
562.035	TCGA-ET-A3BX	TCGA-ET-A3BX	MALE	WHITE	24	Thyroid	THCA	MALE	TUMOR FREE	Alive	24	4	1	Minimal (T3)	R0	T3	N1a	MX	Stage I	LIVING	52.43	DiseaseFree	52.43
507.75	TCGA-ET-A3DO	TCGA-ET-A3DO	FEMALE	WHITE	33	Thyroid	THCA	FEMALE	TUMOR FREE	Alive	33	[Not Available]	[Not Available]	None	R0	T2	NX	MX	Stage I	LIVING	116.69	Recurred/Progressed	21.65
601.03	TCGA-ET-A3DP	TCGA-ET-A3DP	FEMALE	BLACK OR AFRICAN AMERICAN	43	Thyroid	THCA	FEMALE	TUMOR FREE	Alive	43	[Not Available]	[Not Available]	None	R0	T2	NX	MX	Stage I	LIVING	94.51	DiseaseFree	94.51
506.027	TCGA-ET-A3DQ	TCGA-ET-A3DQ	FEMALE	WHITE	43	Thyroid	THCA	FEMALE	TUMOR FREE	Alive	43	2	0	None	R0	T1	N0	MX	Stage I	LIVING	84.79	DiseaseFree	84.79
498.747	TCGA-ET-A3DR	TCGA-ET-A3DR	FEMALE	WHITE	42	Thyroid	THCA	FEMALE	TUMOR FREE	Alive	42	6	5	None	R0	T1	N1a	MX	Stage I	LIVING	80.52	DiseaseFree	80.52
466.568	TCGA-ET-A3DS	TCGA-ET-A3DS	FEMALE	WHITE	33	Thyroid	THCA	FEMALE	TUMOR FREE	Alive	33	8	0	None	R0	T1	N0	MX	Stage I	LIVING	66.79	DiseaseFree	66.79
420.123	TCGA-ET-A3DT	TCGA-ET-A3DT	FEMALE	WHITE	23	Thyroid	THCA	FEMALE	TUMOR FREE	Alive	23	4	1	None	R0	T2	N1a	MX	Stage I	LIVING	43.69	DiseaseFree	43.69
586.761	TCGA-ET-A3DU	TCGA-ET-A3DU	FEMALE	WHITE	21	Thyroid	THCA	FEMALE	WITH TUMOR	Alive	21	2	1	None	R1	T1	N1a	MX	Stage I	LIVING	62.78	DiseaseFree	62.78
769.037	TCGA-ET-A3DV	TCGA-ET-A3DV	FEMALE	WHITE	68	Thyroid	THCA	FEMALE	TUMOR FREE	Alive	68	1	0	Minimal (T3)	R0	T3	N0	MX	Stage II	LIVING	166.49	DiseaseFree	166.49
483.664	TCGA-ET-A3DW	TCGA-ET-A3DW	MALE	ASIAN	64	Thyroid	THCA	MALE	TUMOR FREE	Alive	64	1	1	None	R0	T2	N1	MX	Stage III	LIVING	24.7	DiseaseFree	24.7
800.391	TCGA-ET-A40P	TCGA-ET-A40P	FEMALE	WHITE	32	Thyroid	THCA	FEMALE	TUMOR FREE	Alive	32	1	0	None	R0	T2	N0	MX	Stage I	LIVING	43.96	DiseaseFree	43.96
615.183	TCGA-ET-A40Q	TCGA-ET-A40Q	MALE	WHITE	38	Thyroid	THCA	MALE	TUMOR FREE	Alive	38	40	19	Minimal (T3)	R0	T3	N1b	MX	Stage I	LIVING	46.22	Recurred/Progressed	7.16
962.079	TCGA-ET-A40R	TCGA-ET-A40R	FEMALE	WHITE	24	Thyroid	THCA	FEMALE	TUMOR FREE	Alive	24	20	7	None	RX	T2	N1a	MX	Stage I	LIVING	44.35	DiseaseFree	44.35
490.991	TCGA-ET-A40S	TCGA-ET-A40S	MALE	WHITE	62	Thyroid	THCA	MALE	TUMOR FREE	Alive	62	12	0	None	RX	T2	N0	MX	Stage II	LIVING	40.18	DiseaseFree	40.18
658.021	TCGA-ET-A40T	TCGA-ET-A40T	FEMALE	WHITE	26	Thyroid	THCA	FEMALE	TUMOR FREE	Alive	26	15	3	None	RX	T2	N1a	MX	Stage I	LIVING	37.45	DiseaseFree	37.45
1211.24	TCGA-ET-A4KN	TCGA-ET-A4KN	FEMALE	WHITE	51	Thyroid	THCA	FEMALE	TUMOR FREE	Alive	51	4	0	Minimal (T3)	R0	T3	N0	MX	Stage III	LIVING	33.15	DiseaseFree	33.15
503.853	TCGA-ET-A4KQ	TCGA-ET-A4KQ	FEMALE	WHITE	45	Thyroid	THCA	FEMALE	TUMOR FREE	Alive	45	[Not Available]	[Not Available]	None	R0	T2	NX	MX	Stage II	LIVING	31.37	DiseaseFree	31.37
621.943	TCGA-FE-A22Z	TCGA-FE-A22Z	FEMALE	WHITE	61	Thyroid	THCA	FEMALE	TUMOR FREE	Alive	61	6	5	Moderate/Advanced (T4a)	R0	T4a	N1	MX	Stage IVA	LIVING	73.69	Recurred/Progressed	68.76
405.64	TCGA-FE-A230	TCGA-FE-A230	FEMALE	WHITE	30	Thyroid	THCA	FEMALE	TUMOR FREE	Alive	30	3	3	None	R0	T3	N1a	MX	Stage I	LIVING	71.39	Recurred/Progressed	17.28
563.351	TCGA-FE-A231	TCGA-FE-A231	MALE	WHITE	70	Thyroid	THCA	MALE	TUMOR FREE	Alive	70	31	16	None	R0	T3	N1b	MX	Stage IVA	LIVING	31.57	DiseaseFree	31.57
665.79	TCGA-FE-A232	TCGA-FE-A232	FEMALE	WHITE	44	Thyroid	THCA	FEMALE	TUMOR FREE	Alive	44	0	0	Minimal (T3)	R0	T3	NX	MX	Stage I	LIVING	79.63	DiseaseFree	79.63
408.377	TCGA-FE-A233	TCGA-FE-A233	FEMALE	WHITE	18	Thyroid	THCA	FEMALE	TUMOR FREE	Alive	18	0	0	None	R0	T2	NX	MX	Stage I	LIVING	24.67	Recurred/Progressed	18.63
498.205	TCGA-FE-A234	TCGA-FE-A234	FEMALE	WHITE	26	Thyroid	THCA	FEMALE	WITH TUMOR	Alive	26	2	2	None	R0	T2	N1	MX	Stage I	LIVING	68.17	Recurred/Progressed	15.87
692.797	TCGA-FE-A235	TCGA-FE-A235	FEMALE	WHITE	26	Thyroid	THCA	FEMALE	TUMOR FREE	Alive	26	4	3	None	R0	T2	N1	MX	Stage I	LIVING	117.31	DiseaseFree	117.31
449.651	TCGA-FE-A236	TCGA-FE-A236	MALE	WHITE	33	Thyroid	THCA	MALE	TUMOR FREE	Alive	33	5	5	None	R0	T2	N1	MX	Stage I	LIVING	66.72	DiseaseFree	66.72
523.275	TCGA-FE-A237	TCGA-FE-A237	FEMALE	WHITE	19	Thyroid	THCA	FEMALE	WITH TUMOR	Alive	19	5	3	Minimal (T3)	R0	T3	N1	MX	Stage I	LIVING	112.71	Recurred/Progressed	22.77
544.061	TCGA-FE-A238	TCGA-FE-A238	FEMALE	WHITE	36	Thyroid	THCA	FEMALE	WITH TUMOR	Alive	36	1	0	Minimal (T3)	R0	T3	N0	MX	Stage I	LIVING	39.91	Recurred/Progressed	14.16
658.266	TCGA-FE-A239	TCGA-FE-A239	MALE	WHITE	82	Thyroid	THCA	MALE	WITH TUMOR	Dead	82	2	0	None	R0	T3	N0	MX	Stage III	DECEASED	33.61	Recurred/Progressed	30.65
624.511	TCGA-FE-A23A	TCGA-FE-A23A	FEMALE	WHITE	27	Thyroid	THCA	FEMALE	TUMOR FREE	Alive	27	13	0	None	R0	T2	N0	MX	Stage I	LIVING	81.77	DiseaseFree	81.77
762.568	TCGA-FE-A3PA	TCGA-FE-A3PA	MALE	WHITE	16	Thyroid	THCA	MALE	WITH TUMOR	Alive	16	[Not Available]	[Not Available]	Minimal (T3)	R2	T4	N0	M1	Stage II	LIVING	106.27	DiseaseFree	106.27
636.62	TCGA-FE-A3PB	TCGA-FE-A3PB	FEMALE	WHITE	33	Thyroid	THCA	FEMALE	TUMOR FREE	Alive	33	5	5	Minimal (T3)	R0	T3	N1a	MX	Stage I	LIVING	85.09	DiseaseFree	85.09
538.884	TCGA-FE-A3PC	TCGA-FE-A3PC	FEMALE	WHITE	37	Thyroid	THCA	FEMALE	TUMOR FREE	Alive	37	19	19	None	R0	T3	N1	MX	Stage I	LIVING	85.61	DiseaseFree	85.61
813.533	TCGA-FE-A3PD	TCGA-FE-A3PD	FEMALE	WHITE	17	Thyroid	THCA	FEMALE	TUMOR FREE	Alive	17	3	0	None	R0	T2	N0	MX	Stage I	LIVING	78.71	DiseaseFree	78.71
879.987	TCGA-FK-A3S3	TCGA-FK-A3S3	FEMALE	BLACK OR AFRICAN AMERICAN	43	Thyroid	THCA	FEMALE	TUMOR FREE	Alive	43	11	4	Minimal (T3)	R0	T3	N1b	MX	Stage I	LIVING	71.02	DiseaseFree	71.02
585.505	TCGA-FK-A3SB	TCGA-FK-A3SB	FEMALE	ASIAN	28	Thyroid	THCA	FEMALE	TUMOR FREE	Alive	28	14	2	Minimal (T3)	R0	T3	N1a	MX	Stage I	LIVING	4.11	DiseaseFree	4.11
1128.91	TCGA-FK-A3SD	TCGA-FK-A3SD	FEMALE	WHITE	61	Thyroid	THCA	FEMALE	TUMOR FREE	Alive	61	[Not Available]	[Not Available]	[Not Available]	R0	T1	N0	M0	Stage I	LIVING	1.05	DiseaseFree	1.05
529.922	TCGA-FK-A3SE	TCGA-FK-A3SE	FEMALE	ASIAN	31	Thyroid	THCA	FEMALE	TUMOR FREE	Alive	31	8	2	None	R0	T2	N1a	MX	Stage I	LIVING	22.01	DiseaseFree	22.01
874.717	TCGA-FK-A3SG	TCGA-FK-A3SG	FEMALE	WHITE	21	Thyroid	THCA	FEMALE	TUMOR FREE	Alive	21	14	6	None	R0	T2	N1b	MX	Stage I	LIVING	0.92	DiseaseFree	0.92
853.626	TCGA-FK-A3SH	TCGA-FK-A3SH	FEMALE	WHITE	50	Thyroid	THCA	FEMALE	TUMOR FREE	Alive	50	8	2	None	R0	T2	N1a	MX	Stage III	LIVING	48.06	DiseaseFree	48.06
579.647	TCGA-FK-A4UB	TCGA-FK-A4UB	MALE	WHITE	51	Thyroid	THCA	MALE	TUMOR FREE	Alive	51	85	20	Minimal (T3)	R1	T3	N1a	MX	Stage III	LIVING	116	DiseaseFree	116
597.834	TCGA-FY-A2QD	TCGA-FY-A2QD	FEMALE	BLACK OR AFRICAN AMERICAN	61	Thyroid	THCA	FEMALE	TUMOR FREE	Alive	61	3	0	None	[Not Available]	T1	N0	[Not Available]	[Not Available]	LIVING	1.25	DiseaseFree	1.25
449.721	TCGA-FY-A3BL	TCGA-FY-A3BL	MALE	WHITE	29	Thyroid	THCA	MALE	TUMOR FREE	Alive	29	[Not Available]	[Not Available]	None	R0	T1	NX	M0	Stage I	LIVING	20.4	DiseaseFree	20.4
684.462	TCGA-FY-A3I4	TCGA-FY-A3I4	FEMALE	WHITE	34	Thyroid	THCA	FEMALE	TUMOR FREE	Alive	34	1	0	None	R0	T2	N0	M0	Stage I	LIVING	17.81	DiseaseFree	17.81
746.063	TCGA-FY-A3I5	TCGA-FY-A3I5	FEMALE	WHITE	64	Thyroid	THCA	FEMALE	TUMOR FREE	Alive	64	14	0	None	R0	T3	N0	MX	Stage III	LIVING	7.82	DiseaseFree	7.82
535.834	TCGA-FY-A3NM	TCGA-FY-A3NM	FEMALE	WHITE	48	Thyroid	THCA	FEMALE	TUMOR FREE	Alive	48	6	0	Minimal (T3)	R0	T3	N0	MX	Stage III	LIVING	29.07	DiseaseFree	29.07
577.988	TCGA-FY-A3NN	TCGA-FY-A3NN	FEMALE	[Not Available]	48	Thyroid	THCA	FEMALE	[Not Available]	Alive	48	4	2	None	R0	T1b	N1a	MX	Stage III	LIVING	0	DiseaseFree	0
584.602	TCGA-FY-A3NP	TCGA-FY-A3NP	MALE	WHITE	69	Thyroid	THCA	MALE	TUMOR FREE	Alive	69	[Not Available]	[Not Available]	None	R0	T1	N0	M0	Stage I	LIVING	16.13	DiseaseFree	16.13
668.267	TCGA-FY-A3ON	TCGA-FY-A3ON	MALE	WHITE	20	Thyroid	THCA	MALE	TUMOR FREE	Alive	20	4	1	None	R0	T2	N1	MX	Stage I	LIVING	19.55	DiseaseFree	19.55
644.953	TCGA-FY-A3R6	TCGA-FY-A3R6	FEMALE	WHITE	57	Thyroid	THCA	FEMALE	[Not Available]	Alive	57	30	5	None	R0	T2	N1b	MX	Stage IVA	LIVING	13.9	DiseaseFree	13.9
500.306	TCGA-FY-A3R7	TCGA-FY-A3R7	FEMALE	WHITE	50	Thyroid	THCA	FEMALE	[Not Available]	Alive	50	2	2	Minimal (T3)	[Not Available]	T3	N1a	MX	Stage III	LIVING	16.26	DiseaseFree	16.26
467.878	TCGA-FY-A3R8	TCGA-FY-A3R8	FEMALE	WHITE	62	Thyroid	THCA	FEMALE	TUMOR FREE	Alive	62	[Not Available]	[Not Available]	Minimal (T3)	R0	T3	NX	MX	Stage III	LIVING	15.67	DiseaseFree	15.67
777.741	TCGA-FY-A3R9	TCGA-FY-A3R9	FEMALE	WHITE	66	Thyroid	THCA	FEMALE	[Not Available]	Alive	66	1	0	None	R0	T1a	N0	MX	Stage I	LIVING	16.56	DiseaseFree	16.56
660.071	TCGA-FY-A3RA	TCGA-FY-A3RA	FEMALE	WHITE	21	Thyroid	THCA	FEMALE	TUMOR FREE	Alive	21	[Not Available]	[Not Available]	None	R0	T2	NX	MX	Stage I	LIVING	18.07	DiseaseFree	18.07
511.211	TCGA-FY-A3TY	TCGA-FY-A3TY	FEMALE	WHITE	61	Thyroid	THCA	FEMALE	[Not Available]	Alive	61	6	0	Minimal (T3)	R0	T3	N0	MX	Stage III	LIVING	23.29	DiseaseFree	23.29
622.862	TCGA-FY-A3W9	TCGA-FY-A3W9	FEMALE	WHITE	66	Thyroid	THCA	FEMALE	WITH TUMOR	Alive	66	1	0	None	R1	T2	N0	MX	Stage II	LIVING	21.62	DiseaseFree	21.62
592.92	TCGA-FY-A3WA	TCGA-FY-A3WA	FEMALE	WHITE	52	Thyroid	THCA	FEMALE	TUMOR FREE	Alive	52	[Not Available]	[Not Available]	None	R0	T1a	NX	MX	Stage I	LIVING	17.05	DiseaseFree	17.05
635.813	TCGA-FY-A3YR	TCGA-FY-A3YR	FEMALE	WHITE	64	Thyroid	THCA	FEMALE	TUMOR FREE	Alive	64	11	4	Minimal (T3)	R0	T3	N1a	MX	Stage III	LIVING	17.35	DiseaseFree	17.35
426.388	TCGA-FY-A40K	TCGA-FY-A40K	FEMALE	WHITE	46	Thyroid	THCA	FEMALE	TUMOR FREE	Alive	46	4	0	None	R0	T1a	N0	MX	Stage I	LIVING	15.14	DiseaseFree	15.14
557.617	TCGA-FY-A40L	TCGA-FY-A40L	FEMALE	WHITE	55	Thyroid	THCA	FEMALE	TUMOR FREE	Alive	55	3	2	Moderate/Advanced (T4a)	RX	T4a	N1b	MX	Stage IVA	LIVING	23.85	DiseaseFree	23.85
583.04	TCGA-FY-A40M	TCGA-FY-A40M	FEMALE	WHITE	51	Thyroid	THCA	FEMALE	TUMOR FREE	Alive	51	5	0	None	R0	T1b	N0	MX	Stage I	LIVING	22.47	DiseaseFree	22.47
536.03	TCGA-FY-A40N	TCGA-FY-A40N	FEMALE	WHITE	55	Thyroid	THCA	FEMALE	TUMOR FREE	Alive	55	3	0	None	R0	T1a	N0	MX	Stage I	LIVING	19.02	DiseaseFree	19.02
621.988	TCGA-FY-A4B0	TCGA-FY-A4B0	MALE	WHITE	76	Thyroid	THCA	MALE	WITH TUMOR	Alive	76	[Not Available]	[Not Available]	None	R1	T1a	NX	MX	Stage I	LIVING	13.8	DiseaseFree	13.8
559.039	TCGA-FY-A4B3	TCGA-FY-A4B3	MALE	WHITE	51	Thyroid	THCA	MALE	WITH TUMOR	Alive	51	4	4	Minimal (T3)	R1	T3	N1a	MX	Stage III	LIVING	14.03	DiseaseFree	14.03
647.799	TCGA-FY-A4B4	TCGA-FY-A4B4	FEMALE	WHITE	62	Thyroid	THCA	FEMALE	WITH TUMOR	Alive	62	3	2	None	R1	T1b	N1a	MX	Stage III	LIVING	21.58	DiseaseFree	21.58
629.521	TCGA-FY-A76V	TCGA-FY-A76V	MALE	BLACK OR AFRICAN AMERICAN	54	Thyroid	THCA	MALE	TUMOR FREE	Alive	54	[Not Available]	[Not Available]	None	R0	T2	NX	MX	Stage II	LIVING	1.68	DiseaseFree	1.68
521.431	TCGA-GE-A2C6	TCGA-GE-A2C6	FEMALE	WHITE	33	Thyroid	THCA	FEMALE	TUMOR FREE	Alive	33	23	14	None	RX	T2	N1b	MX	Stage I	LIVING	12.52	DiseaseFree	12.52
414.643	TCGA-H2-A26U	TCGA-H2-A26U	FEMALE	WHITE	54	Thyroid	THCA	FEMALE	TUMOR FREE	Alive	54	7	0	Minimal (T3)	[Not Available]	T3	N0	MX	Stage III	LIVING	16.98	DiseaseFree	16.98
821.585	TCGA-H2-A2K9	TCGA-H2-A2K9	MALE	WHITE	25	Thyroid	THCA	MALE	[Not Available]	Alive	25	14	11	None	[Not Available]	T2	N1b	MX	Stage I	LIVING	21.65	DiseaseFree	21.65
850.156	TCGA-H2-A3RH	TCGA-H2-A3RH	FEMALE	WHITE	41	Thyroid	THCA	FEMALE	TUMOR FREE	Alive	41	3	0	None	[Not Available]	T1b	N0	M0	Stage I	LIVING	12.45	DiseaseFree	12.45
606.64	TCGA-H2-A3RI	TCGA-H2-A3RI	FEMALE	WHITE	29	Thyroid	THCA	FEMALE	[Discrepancy]	Alive	29	5	0	Minimal (T3)	[Not Available]	T3	N0	MX	Stage I	LIVING	11.01	Recurred/Progressed	9.17
621.188	TCGA-H2-A421	TCGA-H2-A421	FEMALE	WHITE	34	Thyroid	THCA	FEMALE	[Not Available]	Alive	34	3	2	None	[Not Available]	T1b	N1a	M0	Stage I	LIVING	20.04	DiseaseFree	20.04
415.935	TCGA-H2-A422	TCGA-H2-A422	FEMALE	WHITE	40	Thyroid	THCA	FEMALE	[Not Available]	Alive	40	3	0	None	RX	T2	N0	MX	Stage I	LIVING	18.59	DiseaseFree	18.59
589.09	TCGA-IM-A3EB	TCGA-IM-A3EB	FEMALE	WHITE	32	Thyroid	THCA	FEMALE	TUMOR FREE	Alive	32	12	3	Minimal (T3)	R0	T3	N1a	MX	Stage I	LIVING	48.88	DiseaseFree	48.88
433.532	TCGA-IM-A3ED	TCGA-IM-A3ED	FEMALE	WHITE	58	Thyroid	THCA	FEMALE	TUMOR FREE	Alive	58	9	0	None	R0	T1	N0	MX	Stage I	LIVING	47.37	DiseaseFree	47.37
714.836	TCGA-IM-A3U2	TCGA-IM-A3U2	FEMALE	WHITE	89	Thyroid	THCA	FEMALE	TUMOR FREE	Alive	89	33	25	Minimal (T3)	R0	T3	N1b	MX	Stage IVA	LIVING	18.5	DiseaseFree	18.5
534.219	TCGA-IM-A3U3	TCGA-IM-A3U3	FEMALE	WHITE	55	Thyroid	THCA	FEMALE	TUMOR FREE	Alive	55	8	0	None	RX	T1b	N0	MX	Stage I	LIVING	16.89	DiseaseFree	16.89
748.195	TCGA-IM-A41Y	TCGA-IM-A41Y	FEMALE	WHITE	42	Thyroid	THCA	FEMALE	TUMOR FREE	Alive	42	18	4	Minimal (T3)	R0	T3	N1a	MX	Stage I	LIVING	21.81	DiseaseFree	21.81
612.782	TCGA-IM-A41Z	TCGA-IM-A41Z	FEMALE	WHITE	37	Thyroid	THCA	FEMALE	TUMOR FREE	Alive	37	20	1	None	R0	T1b	N0	MX	Stage I	LIVING	31.08	DiseaseFree	31.08
555.331	TCGA-IM-A420	TCGA-IM-A420	FEMALE	WHITE	39	Thyroid	THCA	FEMALE	TUMOR FREE	Alive	39	14	5	None	R0	T2	N1a	MX	Stage I	LIVING	8.21	DiseaseFree	8.21
627.97	TCGA-IM-A4EB	TCGA-IM-A4EB	MALE	WHITE	37	Thyroid	THCA	MALE	TUMOR FREE	Alive	37	11	9	Minimal (T3)	R0	T3	N1b	MX	Stage I	LIVING	25.62	DiseaseFree	25.62
600.616	TCGA-J8-A3NZ	TCGA-J8-A3NZ	FEMALE	WHITE	52	Thyroid	THCA	FEMALE	[Not Available]	Alive	52	9	2	Minimal (T3)	R0	T3	N1a	M0	Stage III	LIVING	17.21	DiseaseFree	17.21
999.361	TCGA-J8-A3O0	TCGA-J8-A3O0	MALE	WHITE	38	Thyroid	THCA	MALE	TUMOR FREE	Alive	38	3	0	None	R0	T2	N0	M0	Stage I	LIVING	43.13	DiseaseFree	43.13
436.555	TCGA-J8-A3O1	TCGA-J8-A3O1	FEMALE	WHITE	33	Thyroid	THCA	FEMALE	TUMOR FREE	Alive	33	19	12	None	R0	T3	N1b	M0	Stage I	LIVING	27.17	DiseaseFree	27.17
459.385	TCGA-J8-A3O2	TCGA-J8-A3O2	MALE	WHITE	39	Thyroid	THCA	MALE	WITH TUMOR	Alive	39	106	23	Minimal (T3)	R1	T3	N1b	M0	Stage I	LIVING	11.24	DiseaseFree	11.24
521.931	TCGA-J8-A3O2	TCGA-J8-A3O2	MALE	WHITE	39	Thyroid	THCA	MALE	WITH TUMOR	Alive	39	106	23	Minimal (T3)	R1	T3	N1b	M0	Stage I	LIVING	11.24	DiseaseFree	11.24
603.968	TCGA-J8-A3YD	TCGA-J8-A3YD	FEMALE	WHITE	47	Thyroid	THCA	FEMALE	TUMOR FREE	Alive	47	6	2	None	R0	T1b	N1a	M0	Stage III	LIVING	31.8	DiseaseFree	31.8
485.44	TCGA-J8-A3YE	TCGA-J8-A3YE	FEMALE	WHITE	31	Thyroid	THCA	FEMALE	TUMOR FREE	Alive	31	4	1	Minimal (T3)	R0	T3	N1	M0	Stage I	LIVING	27.83	DiseaseFree	27.83
658.187	TCGA-J8-A3YF	TCGA-J8-A3YF	MALE	WHITE	83	Thyroid	THCA	MALE	TUMOR FREE	Alive	83	21	1	None	R0	T1	N1	M0	Stage III	LIVING	24.67	DiseaseFree	24.67
519.613	TCGA-J8-A3YG	TCGA-J8-A3YG	FEMALE	WHITE	54	Thyroid	THCA	FEMALE	TUMOR FREE	Alive	54	9	6	None	R0	T2	N1a	M0	Stage III	LIVING	22.27	DiseaseFree	22.27
720.197	TCGA-J8-A3YH	TCGA-J8-A3YH	MALE	WHITE	39	Thyroid	THCA	MALE	TUMOR FREE	Alive	39	40	13	None	R0	T3	N1b	M0	Stage I	LIVING	5.75	DiseaseFree	5.75
665.15	TCGA-J8-A3YH	TCGA-J8-A3YH	MALE	WHITE	39	Thyroid	THCA	MALE	TUMOR FREE	Alive	39	40	13	None	R0	T3	N1b	M0	Stage I	LIVING	5.75	DiseaseFree	5.75
610.38	TCGA-J8-A42S	TCGA-J8-A42S	MALE	WHITE	45	Thyroid	THCA	MALE	[Not Available]	Alive	45	1	1	None	R0	T1b	N1a	MX	Stage III	LIVING	2.46	DiseaseFree	2.46
504.813	TCGA-J8-A4HW	TCGA-J8-A4HW	FEMALE	WHITE	59	Thyroid	THCA	FEMALE	TUMOR FREE	Alive	59	8	7	None	R0	T2	N1	M0	Stage III	LIVING	2.6	DiseaseFree	2.6
506.137	TCGA-J8-A4HW	TCGA-J8-A4HW	FEMALE	WHITE	59	Thyroid	THCA	FEMALE	TUMOR FREE	Alive	59	8	7	None	R0	T2	N1	M0	Stage III	LIVING	2.6	DiseaseFree	2.6
729.003	TCGA-J8-A4HY	TCGA-J8-A4HY	FEMALE	WHITE	68	Thyroid	THCA	FEMALE	TUMOR FREE	Alive	68	40	13	Moderate/Advanced (T4a)	R0	T4a	N1b	MX	Stage IVA	LIVING	0.2	DiseaseFree	0.2
1322.75	TCGA-KS-A41F	TCGA-KS-A41F	FEMALE	WHITE	37	Thyroid	THCA	FEMALE	TUMOR FREE	Alive	37	7	4	None	R0	T2	N1	M0	Stage I	LIVING	143.46	DiseaseFree	143.46
619.343	TCGA-KS-A41I	TCGA-KS-A41I	FEMALE	WHITE	47	Thyroid	THCA	FEMALE	TUMOR FREE	Alive	47	[Not Available]	0	None	R0	T1	N0	M0	Stage I	LIVING	15.97	DiseaseFree	15.97
804.541	TCGA-KS-A41J	TCGA-KS-A41J	FEMALE	WHITE	28	Thyroid	THCA	FEMALE	TUMOR FREE	Alive	28	2	2	None	R0	T2	N1	M0	Stage I	LIVING	15.67	DiseaseFree	15.67
879.63	TCGA-KS-A41L	TCGA-KS-A41L	FEMALE	WHITE	39	Thyroid	THCA	FEMALE	TUMOR FREE	Alive	39	3	0	None	R0	T2	N0	M0	Stage I	LIVING	113.76	DiseaseFree	113.76
682.974	TCGA-KS-A4I1	TCGA-KS-A4I1	FEMALE	ASIAN	37	Thyroid	THCA	FEMALE	[Not Available]	Alive	37	4	0	None	R1	T2	N0	M0	Stage I	LIVING	26.68	DiseaseFree	26.68
497.988	TCGA-KS-A4I3	TCGA-KS-A4I3	MALE	ASIAN	41	Thyroid	THCA	MALE	TUMOR FREE	Alive	41	8	8	Minimal (T3)	R1	T3	N1	M0	Stage I	LIVING	43.66	DiseaseFree	43.66
656.094	TCGA-KS-A4I5	TCGA-KS-A4I5	FEMALE	WHITE	49	Thyroid	THCA	FEMALE	TUMOR FREE	Alive	49	2	0	None	R0	T1b	N1b	M0	Stage IVA	LIVING	18.63	DiseaseFree	18.63
629.108	TCGA-KS-A4I7	TCGA-KS-A4I7	FEMALE	WHITE	61	Thyroid	THCA	FEMALE	TUMOR FREE	Alive	61	4	0	None	R0	T1b	N0	M0	Stage I	LIVING	32.42	DiseaseFree	32.42
596.119	TCGA-KS-A4I9	TCGA-KS-A4I9	FEMALE	BLACK OR AFRICAN AMERICAN	46	Thyroid	THCA	FEMALE	[Not Available]	Alive	46	5	0	None	R0	T1b	N0	M0	Stage I	LIVING	87.32	DiseaseFree	87.32
504.492	TCGA-KS-A4IB	TCGA-KS-A4IB	FEMALE	ASIAN	41	Thyroid	THCA	FEMALE	[Not Available]	Alive	41	7	2	None	R0	T2	N1	M0	Stage I	LIVING	84.66	DiseaseFree	84.66
577.191	TCGA-KS-A4IC	TCGA-KS-A4IC	FEMALE	WHITE	45	Thyroid	THCA	FEMALE	[Not Available]	Alive	45	4	2	None	RX	T1b	N1a	M0	Stage III	LIVING	35.25	DiseaseFree	35.25
683.538	TCGA-KS-A4ID	TCGA-KS-A4ID	FEMALE	WHITE	55	Thyroid	THCA	FEMALE	TUMOR FREE	Alive	55	13	0	None	R0	T1	N0	M0	Stage I	LIVING	33.21	DiseaseFree	33.21
817.83	TCGA-L6-A4EP	TCGA-L6-A4EP	FEMALE	ASIAN	41	Thyroid	THCA	FEMALE	TUMOR FREE	Alive	41	1	0	None	R0	T2	N0	M0	Stage I	LIVING	33.38	DiseaseFree	33.38
581.052	TCGA-L6-A4EQ	TCGA-L6-A4EQ	MALE	WHITE	47	Thyroid	THCA	MALE	TUMOR FREE	Alive	47	1	1	None	R0	T2	N1a	M0	Stage III	LIVING	40.34	DiseaseFree	40.34
650.489	TCGA-L6-A4ET	TCGA-L6-A4ET	FEMALE	WHITE	49	Thyroid	THCA	FEMALE	TUMOR FREE	Alive	49	[Not Available]	[Not Available]	None	R0	T3	NX	M1	Stage IVC	LIVING	21.81	DiseaseFree	21.81
649.829	TCGA-L6-A4EU	TCGA-L6-A4EU	FEMALE	BLACK OR AFRICAN AMERICAN	58	Thyroid	THCA	FEMALE	TUMOR FREE	Alive	58	33	4	Minimal (T3)	R1	T3	N1a	M0	Stage III	LIVING	9.49	DiseaseFree	9.49
537.754	TCGA-MK-A4N6	TCGA-MK-A4N6	MALE	WHITE	35	Thyroid	THCA	MALE	WITH TUMOR	Alive	35	77	40	[Not Available]	R0	T3	N1b	M0	Stage I	LIVING	36.07	DiseaseFree	36.07
620.339	TCGA-MK-A4N7	TCGA-MK-A4N7	FEMALE	WHITE	20	Thyroid	THCA	FEMALE	TUMOR FREE	Alive	20	2	0	None	R0	T2	N0	M0	Stage I	LIVING	32.42	DiseaseFree	32.42
670.025	TCGA-MK-A4N9	TCGA-MK-A4N9	FEMALE	WHITE	41	Thyroid	THCA	FEMALE	TUMOR FREE	Alive	41	9	1	Minimal (T3)	R0	T3	N1	M0	Stage I	LIVING	30.19	DiseaseFree	30.19
774.478	TCGA-MK-A84Z	TCGA-MK-A84Z	MALE	BLACK OR AFRICAN AMERICAN	74	Thyroid	THCA	MALE	TUMOR FREE	Alive	74	[Not Available]	[Not Available]	[Not Available]	[Not Available]	T3	NX	MX	Stage III	LIVING	23.92	DiseaseFree	23.92
622.39	TCGA-QD-A8IV	TCGA-QD-A8IV	FEMALE	BLACK OR AFRICAN AMERICAN	50	Thyroid	THCA	FEMALE	TUMOR FREE	Alive	50	38	15	Minimal (T3)	RX	T3	N1b	MX	Stage IVA	LIVING	12.88	DiseaseFree	12.88
